# Supplementary material for: Multi-grid algorithm for passive tracer transport in NEMO oceancirculation model: a case study with NEMO OGCM (version 3.6)
Source: Copernicus journal article supplement (doi:10.5194/gmd-2019-341), 2020-01-28
Supplement: Supplementary file [file gmd-2019-341-AC1-supplement.pdf]

**Author comments**

Multi-grid algorithm for passive tracer transport in NEMO ocean circulation model:  
a case study with NEMO OGCM (version 3.6)  
C. Bricaud et al  
submitted to Geoscientific Model Development, manuscript ID:gmd-2019-341

Corrections consecutive to referees' comments are highlighted in red.

5

The manuscript presents a method for simultaneously applying spatial grids of multiple resolution to a popular ocean model for the purposes of reducing the computational cost of running complex biogeochemical modules. It estimates a factor 6.7 reduction in cost while achieving similar results to the single-grid high resolution version. Improving computational efficiency in models with large user groups and code bases is a priority in earth system modelling. This manuscript represents a substantial contribution to the science that is within the scope of GMD. The authors use valid methods to assess their model at a variety of spatial scales and provide sensitivity tests and examples to demonstrate their decision-making. Results are presented clearly and appropriately. Model code and other necessary scripts are provided with instructions. Some of the language needs revisiting, please see below.

**Reply:** We thank the reviewer for the helpful feedback on our manuscript.

Specific comments: Climate is mentioned a couple of times in the manuscript, but what is demonstrated in this study is that a very slow model can be made faster (but, relative to e.g. EMICS, it is still very slow). The general motivation of making a model faster is clearly laid out in the Introduction, but even with the demonstrated improvement in run time, as a reader I am left with uncertainty exactly what is gained with a 3X faster NEMO+PISCES. Some discussion of this in Sections 6 or 7 could help to clarify e.g. 1) does this improved run time move NEMO+PISCES into a new category of earth system models? 2) what new kinds of applications are made possible by the improved run time?

**Reply:** The complexity of the model doesn't change. By reducing the computational cost of the biogeochemical component, the algorithm will to advect passive tracers with high resolution dynamic and to integrate it over longer periods.

10 **Action:** A paragraph is added in the section 7.

Simulations of 1 year are compared, but how close is the model to steady-state after only 1 year if the model is started from rest? A statement regarding why 1 year of simulation is selected for the comparison would be informative.

15 **Reply:** Indeed the comparison of simulated tracer distribution are performed on tracer fields that have not reached statistical equilibrium yet, would would take centuries to millennia of model integration. But after one year of integration, the tracer distribution have been transported and stirred during several mesoscale eddy turnover time-scales so that significant differences can be detected across the simulations. We therefore believe that it is not necessary to wait until statistical equilibrium for comparing tracer distributions. Our approach is in line with the experimental protocols of many studies on tracer transport by mesoscale and submesoscale flows. For instance Levy et al. (2012) (doi: 10.1016/j.ocemod.2012.02.004) and Smith et al. (2016) (doi:10.1002/2015JC011089) compare tracer distributions after only several days of model integration, because this horizon is still longer than the typical timescale for evolution of the velocity field in their experiments. We have included a  
20 couple of sentences in the text for explaining this choice of comparing tracer distributions after 365 days.

Technical corrections:

P1L4: “to compute” should be “the computation of”

P1L7: “allows to reduce” should be “reduces”

P1L8: “tracers”

P1L10, P1L11: “factor of 3”; “factor of 7”

P1L13: “Propo-sitions for further reducing this cost are discussed.” P2L31: run a spell-check for “op-erationnal” and “panel”

P2L34: “ecosystems”

P2L45: “and is used in the”

P2L47: This sentence is confusing. I suggest “The concept of effective resolution of physical ocean models provides a theoretical justification...”

P3L50: “observation”

P3L53: “experiments”, “difference”

P3L54: “with the velocity field...has been...”

P3L65: “inparticular detail”

P3L69: “grid in which”

P3L72: “by the hydrodynamical”

P4L98: “con-sists of”

P4L101: “that will be discussed”

P6L127: “surface area”

P6L135: remove “autoref”

P7L137: “of the multi-grid...consists of defining...”

P9L167: “very sensi-tive to”

P9L170: “such a method”

P10L181: “using the multi-grid”

P10L186: “use the domain”

P12L224: “Throughflow”

P12L225: “close to”

P13L251: remove “grid” before “multi-grid”

P13L253: remove “subsection”

P15: please make the x and y values larger in Fig.5 b,c,d.

P16L290: remove “subsection”

P16L293: remove “appendix”

7L310: “Despite the degraded spatial resolution operating on the velocities...”

P17L311: remove extra “the”

P17L316: “responsible for...passivetracer...”

P17L317: “...but it might be computed on...” Although, as I understand the vertical diffusion coefficient is calculated on HR and coarsened using the several methods tested. A better phrasing might be: “and coarsened to the HRCRS grid”

P18L320: remove extra “section”

P18L327: “results more comparable to LR”

P18L329: “skill”

P18L335: “extends”

P18L338: “...we assess the...at simulating the...the Ross...”

P19L344: “solutions...performances than the...”

P19L347: “Figure 9 show...HRCRS solution...”

P19L351: “...the convection...”

P20L362: “caused by” P20L363: “except in the area”

P22L376: “...only with large...”

P23L381: “the coarsened grid” Table 4: “with/without” should be “without/with”. What are the time units?

P23L384 and Table 4 caption: Do you mean row?

P23L386: “allows us to reduce”

P23L392: remove ex-tra “table”  
 P23L395: ”than the ocean/sea...” Table 5: “without versus with”  
 P24L399: “their” should be “there”  
 P24L402: “both grids share” Figure 13: “Outer”  
 P25L411: “perspective” should be “extension”; “in its present form”  
 P25L421: “which resolution” should be “whose resolution”  
 P25L422: “allow the switch”  
 P26L435: “...the reduction of elapsed time might be substantial...” (An estimate has been provided but not proven)  
 P26L436: “case of comprehensive”; “allows us to reduce...” P26L438: “for furtherimproving the performance”  
 P26L439: “allow us to increase”  
 P26L441: ”even closeto”  
 P27L458: “configurations”  
 P27L467: “configuration”...”too noisy”  
 P27L468:”of thetracer”  
 P27L471: “in terms of the ”  
 P28L478: “development”.

**Action:** Spelling mistakes are corrected in red in the text.

**Action:** In fig05, X and Y values font is greater now.

25 **Action for "Table4: What are the time units!":** The unit is added in the text caption.

**Action for "Figure 13: “Outer””:** The figure 13 is corrected

P15: please explain in the text why HRCRS is missing from Fig.5 b,c,d at the smaller spatial scales. For example, it appears both LR and HR can simulate low KE but HRCRS cannot.

30 **Reply:** HRCRS and also LR are missing the smaller spatial scales. Power spectra are computed along the horizontal coordinates of the model grids. For each spectrum, the minimum wavelength corresponds to twice model grid spacing:  $2 * \Delta x$ . HRCRS velocities are computed on the LR grid. HR grid resolution is around 25 km and LR/HRCRS grid resolution is around 75 km. So for HR,  $1.(2 * \Delta x) \simeq 2.e - 2$  and for LR/HRCRS,  $1.(2 * \Delta x) \simeq 6.e - 3$

**Action:** Explanations are added in the text.

## Referee 2

35

It is a well written manuscript, and I am happy to recommend it for the journal. Surely, the central part of the manuscript deals with just the coarsening procedure. However, there are many accompanying issues such as vertical diffusivity, isoneutral slope, vertical cell size, etc., which have to be addressed simultaneously with coarsening; namely the description of how they are addressed is the most valuable part of the manuscript. No numerical operator is accurate at the grid scale, so that advection of numerous tracers at the original resolution in reality only kills computational resources without making tracers any more accurate compared to the case when they are advected with reasonably coarsened velocities. One still needs extra resolution for ocean dynamics to reduce overall dissipation, but the effective resolution, as mentioned in the manuscript is much coarser than the grid scale. I think the approach proposed in the manuscript is a very good way to limit overuse of computational resources, especially given the present tendency of moving to 1/4 or 1/12 degree resolution in climate research.

**Reply:** We thank the reviewer for his constructive comments on the manuscript.

Some minor points: General: In many figures the axes or legends are hardly readable, the font size has to be increased.

**Action:** Legends and/or axes font size is increased for fig05, fig08 a,d fig09.

line 2 running models is expensive or cost of .... is large  
line 7 allows to -> allows someone to (also several times in the text)  
line 43 remove 'also'  
54 inferior to -> smaller than  
Formula 2 and 3 — explain that i,j are the horizontal and k vertical indices  
103 akin -> scalar  
135 edit  
160 the HR buoyancy?? What is coarsened  $N^2$  or isoneutral density?  
187 jpk/HR  
193 called to memory -> made available?  
214 upfront? – just omit  
215 or  
225 close  
236 This sentence can be omitted  
249 Isemax just equatorial resolution?  
260 Why eddy?  
270 adjust semicolumn  
282 adjust,as  
303 plays on important role on? Just omit. ...resolution influences ...  
OK 338 remove 'propose' here and in several other places. You do not propose, you already did.  
377 performance  
390 as much resources as

40 **Action:** Spelling mistakes are corrected in red in the text.

410 one grid point. does it also mean that the third order upwind schemes are not allowed? Of course this will not be a limitation in future.

**Reply:** The coarsening operations are computed over 3 grid points. The scheme order has no influence on coarsening operators stencil.

# Multi-grid algorithm for passive tracer transport in NEMO ocean circulation model: a case study with NEMO OGCM (version 3.6)

Clément Bricaud<sup>1</sup>, Julien Le Sommer<sup>2</sup>, Gurvan Madec<sup>3</sup>, Christophe Calone<sup>4</sup>, Julie Deshayes<sup>5</sup>, Christian Ethe<sup>6</sup>, Jérôme Chanut<sup>7</sup>, and Marina Levy<sup>8</sup>

<sup>1</sup>Mercator Ocean International, F-31520 Ramonville-Saint-Agne, France

<sup>2</sup>Univ. Grenoble Alpes, CNRS, IRD, G-INP, IGE, F-38000 Grenoble, France

<sup>3</sup>Laboratoire d'Océanographie et du Climat: Expérimentations et Approches Numériques (LOCEAN), IPSL, Sorbonne Université, Paris, 75005, France

<sup>4</sup>Univ. Grenoble Alpes, CNRS, IRD, G-INP, IGE, F-38000 Grenoble, France

<sup>5</sup>Laboratoire d'Océanographie et du Climat: Expérimentations et Approches Numériques (LOCEAN), IPSL, Sorbonne Université, Paris, 75005, France

<sup>6</sup>Laboratoire d'Océanographie et du Climat: Expérimentations et Approches Numériques (LOCEAN), IPSL, Sorbonne Université, Paris, 75005, France

<sup>7</sup>Mercator Ocean International, F-31520 Ramonville-Saint-Agne, France

<sup>8</sup>Laboratoire d'Océanographie et du Climat: Expérimentations et Approches Numériques (LOCEAN), IPSL, Sorbonne Université, Paris, 75005, France

**Correspondence:** Bricaud Clément (cbricaud@mercator-ocean.fr)

**Abstract.** Ocean biogeochemical models are key tools for both scientific and operational applications. Nevertheless the cost of **running** these models is often expensive because of the large number of biogeochemical tracers. This has motivated the development of multi-grid approaches where ocean dynamics and tracer transport are computed on grids of different spatial resolution. However, existing multi-grid approaches to tracer transport in ocean modelling do not allow ~~to compute~~ **the computation of** ocean dynamics and tracer transport simultaneously. This paper describes a new multi-grid approach developed for accelerating the computation of passive tracer transport in the NEMO ocean circulation model. In practice, passive tracer transport is computed at runtime on a grid with coarser spatial resolution than the hydrodynamics, which ~~allows to reduce~~ **reduces** the CPU cost of computing the evolution of tracers. We describe the multi-grid algorithm, its practical implementation in the NEMO ocean model, and discuss its performance on the basis of a series of sensitivity experiments with global ocean model configurations. Our experiments confirm that the spatial resolution of hydrodynamical fields can be coarsened by a factor **of 3** in both horizontal directions without significantly affecting the resolved passive tracer fields. Overall, the proposed algorithm yields a reduction by a factor ~~of 7~~ of the overhead associated with running a full biogeochemical model like PISCES (with 24 passive tracers). Propositions for **further** reducing ~~further~~ this cost without affecting the resolved solution are discussed.

## 1 Introduction

Ocean biogeochemical and ecological models are key tools for numerous applications in oceanography . They are in particular used for process studies (Resplandy et al. (2019)), for climate projections (Rickard et al. (2016), Cabré et al. (2015)), for operational forecasts (Ford et al. (2018)) and for monitoring of marine ecosystems (Fennel et al. (2019)). In practice, ocean  
65 biogeochemical and ecological models describe the evolution of the concentration of several tracers which are both transported by oceanic flows and interacting through non-linear relations among each other (Gruber and Doney (2019), Doney and Glover (2019)). The influence of advection on tracer concentration is represented explicitly using velocity fields from ocean circulation models (Chassignet et al. (2019)), which may be run simultaneously with the ocean biogeochemical and ecological models (coupled models).

70 The computational cost of running biogeochemical and ecological models is usually significant because of the large numbers of variables (Séférian et al. (2016)) required for describing biogeochemical cycles and ecological diversity. This computational cost is split between the computation of tracer transport and the computation of the nonlinear functions relating the state variables of the biogeochemical or ecological models. In coupled applications, the extra-computational cost (aka overhead) with respect to running ocean circulation models only is such that coupled applications are rarely run at the finest grid resolution  
75 accessible to ocean circulation models. Typical resolutions of global hydrodynamical models are between  $1/4^\circ$  and  $1/20^\circ$  whereas typical resolutions of global biogeochemical models are between  $1^\circ$  and  $1/4^\circ$ .

Therefore accounting for the widest possible range of scales in biogeochemical and ecological models is becoming a key bottleneck in the design of ~~operational~~ **operational** and climate models. Indeed, the role of ocean fine scale (1-200km) dynamics and scale interactions on ocean biogeochemistry and marine ecosystems is now well documented (Lévy et al. (2018)).  
80 Ocean fine scale dynamics is known to affect the structure of ecosystems (d'Ovidio et al. (2015)) and to impact the response of ocean biogeochemical cycles to environmental changes (Dufour et al. (2013)). These findings are motivating the ongoing increase in the spatial resolution of ocean components of climate and operational models (Hewitt et al. (2017)). The complexity of biogeochemical and ecological models is also steadily increasing in order to better account for biogeochemical cycles and ecological diversity (Ward et al. (2012)). In this context, improving the computational performance of biogeochemical or  
85 ecological models is becoming an important challenge.

Several approaches, including multi-grid methods, have been proposed in the literature for accelerating the integration of biogeochemical and ecological models. Methods have for instance been proposed for accelerating the spin up of complex biogeochemical models. This includes in particular the transport matrix method (Kvale et al. (2017)). A *multi-grid approach* has also been proposed by (Aumont et al. (1998)), where the output from the ocean circulation model used to drive the  
90 biogeochemical model are coarse-grained, so that the biogeochemical model runs at a lower spatial resolution. This method is currently implemented for NEMO ocean model output and is used in the Copernicus global biogeochemical forecasting system (Perruche et al. (2016)).

Interestingly, ~~the notion of effective resolution of physical ocean model solutions provides a theoretical justification for the performance of multi-grid methods for tracer transport.~~ **The concept of effective resolution of physical ocean models provides a**



95 **theoretical justification for the performance of multi-grid methods for tracer transport.** Indeed, because of numerical dissipation and sub-grid closures, resolved flows properties usually underestimate energy and variance with respect to observations at scales smaller than 5 to 10 times the grid spacing. This observations is formalized with the notion of *effective resolution* introduced by (Skamarock (2004)). The effective resolution can be seen as the smallest scale that is not affected by numerical dissipation (Soufflet et al. (2016)). In contrast, numerical resolution refers to the typical resolution of the discrete grid used  
100 for numerical integration. In a series of sensitivity experiments,(Lévy et al. (2012)) shows very little differences in simulated tracer distribution if tracer transport is computed with velocity field where scales ~~inferior~~ **smaller** to 5-10 dx have been filtered.

Because the existing implementation of multi-grid tracer transport for NEMO ocean model is not meant to be run at the runtime with the physical ocean component, its application is strongly limited by the I/O requirements and storage capacity. Indeed, the method proposed by Aumont et al. (1998) is not a priori designed for *coupled* ocean biogeochemical models  
105 but rather restricted to *offline* applications where the biogeochemical model is using output from a previous ocean circulation model integration. With this algorithm, data from the ocean circulation model should be output and stored on a local file system. The frequency of the coupling between ocean dynamics and the biogeochemical model is therefore limited by the frequency of available ocean model output. The I/O and storage capacity required for such applications is a strong limiting factor with existing climate and operational systems. It is all the more problematic with the foreseen increase in spatial resolution of ocean  
110 components of climate and operational systems.

This paper describes a new multi-grid algorithm for tracer transport, its implementation in NEMO v3.6 and documents its performance in a series of global ocean model experiments. We describe in particular ~~in~~ detail what specific choices have been made for the representation of vertical diffusive fluxes. The algorithm is then tested in a series of global ocean model simulations of varying complexity.

## 115 **2 Evolution equation for a passive tracer**

The objective of the multi-grid algorithm is to solve the evolution equation for a passive tracer on a grid **in** which horizontal spatial resolution is coarser than that of the associated hydrodynamical model. The passive tracer grid dimensions and hydrodynamic variables used in this equation need to be computed from the dynamic grid. In this section, we present the evolution equation for a passive tracer in order to identify which terms are provided by **the** hydrodynamical model and which terms are  
120 computed by the transport module of the biogeochemical model itself.

Following the formalism of the heat conservation equation from (Madec (2008), equation 2.1.d in section 2.1.1 ), the evolution of a biogeochemical tracer can be written as:

$$\frac{\partial C}{\partial t} = -\nabla \cdot (C\vec{V}) + D + F + Sink + Sources \quad (1)$$

where  $\frac{\partial C}{\partial t}$  represents the tracer tendency,  $-\nabla \cdot (C\vec{V})$  the transport of the tracer  $C$  by the hydrodynamic flow,  $D$  the parametrizations for sub-grid-scale processes,  $F$  the surface forcing terms (air-sea or lateral boundary fluxes of tracer, if any) and  $Sink$  and  $Sources$  which are provided by the biogeochemical model.

The influence of sub-grid-scale processes  $D$  can be decomposed in a horizontal part  $D^l$  and a vertical part  $D^v$ :

$$D^l = \nabla_{i,j} \cdot (A^l R \nabla C) \quad (2)$$

represents the contribution of the lateral part along geopotential surfaces,  $R$  being a tensor of iso-neutral slopes and  $A^l$  the lateral eddy diffusivity coefficient and  $i, j$  the grid points horizontal indices, while

$$D^v = \nabla_k \cdot (A^l R \nabla C) + \frac{\partial (A^v \frac{\partial C}{\partial z})}{\partial z} \quad (3)$$

represents the contribution of the lateral part along the vertical direction (first term on the right hand side) and the effect of vertical subgrid physics (second term on the right hand side) with  $A^v$  the vertical eddy diffusivity coefficient and  $k$  the grid points vertical indice.

In order to compute Equation 1 in a multi-grid environment, we first need to be able to apply the  $\nabla$  operator on the coarsened grid, which requires to define adequately the coarsened grid coordinates and dimensions. As a second step, we have to design an operator to compute the terms which are coming from the dynamical model, such as the ocean velocity  $\vec{V}$ , the lateral and vertical diffusivity coefficient  $A^l$  and  $A^v$ , the iso-neutral slopes  $R$  and the surface forcing terms  $F$  on the coarsened grid. Other terms of Equation 1 (tracer tendency, sinks and sources) are computed by the biogeochemical model itself, hence provided on the coarsened grid directly.

### 3 Description of the algorithm

The multi-grid algorithm described below is suitable for Arakawa C-type grid and z-level ocean models. Some adjustments could be performed to adapt it to B-grid ocean models and/or models using different vertical discretizations, but those are not discussed here.

#### 3.1 Definition of the coarsened grid

The first step consists in defining the coordinates, the cell dimensions and the land-sea mask of the coarsened grid based on those of the finer grid. The finer grid used in the ocean dynamics and thermodynamics component is called HR hereafter and the coarser grid in the passive tracer transport component is called HRCRS hereafter. The horizontal coarsening factor used here is 3, a choice that will be discussed thereafter (section 6).

As the equations are solved on an Arakawa C-type grid (Figure 1), temperature, salinity, pressure and other scalar variables are computed at the cells center  $T$  while the velocities are computed at the center of each face of the cell ( $U$  and  $V$ ), normal to the corresponding velocity component.

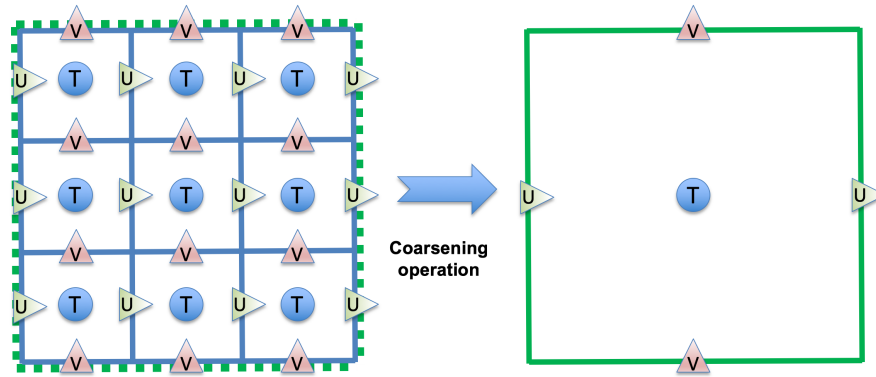

**Figure 1.** Schematic diagram illustrating the definition of the coarsened grid for a coarsening factor of 3 (ocean high-resolution grid is to the left, coarsened grid for biogeochemical model to the right) and localization of tracer (T, blue dots), zonal velocity (U, green triangles) and meridional velocity (V, red triangles) points in both grids. Grid sections that are common to both grids are colored in green.

### 3.1.1 Coordinates

In order to build an HRCRS cell, we take a  $3 \times 3$  square of HR cells (Figure 1) and collocate the HRCRS T,U and V grid points at the same location as the corresponding HR grid points. As a result, the definition of HRCRS grid coordinates can be seen as a sub-sampling of HR grid coordinates.

### 3.1.2 Horizontal dimensions

Defining the horizontal dimensions of the coarsened grid cells is necessary to compute gradient or divergence operators.

For a coarsening factor 3, HRCRS zonal cell size is computed by summing 3 consecutive HR zonal cell sizes along the zonal direction, and HRCRS meridional cell size is computed by summing 3 consecutive HR meridional cell sizes along the meridional direction (Figure 2).

### 3.1.3 Land-sea mask

Defining the land-sea mask for HRCRS is the most strenuous task of the multi-grid algorithm, which requires ad-hoc verification as it can lead to substantial errors in the final outputs. If there is at least one ocean T-point in the HR  $3 \times 3$  pad, then the corresponding HRCRS T-point will be considered as ocean, which can be defined automatically (Figure 3, top panels panel). At the interface between two coarsened grid cells, we carefully retain the shape of the HR mask by adjusting the mask at U- or V-points: when there is at least one ocean point in the HR interface (as in Figure 3, middle panels panel), then the interface of the HRCRS corresponding cells is defined as in the ocean. On the contrary, even if the two HRCRS T-points are in the ocean, the interface between them may be defined as on the land, in case the corresponding HR points along the interface are all on land (Figure 3, bottom panels panel).

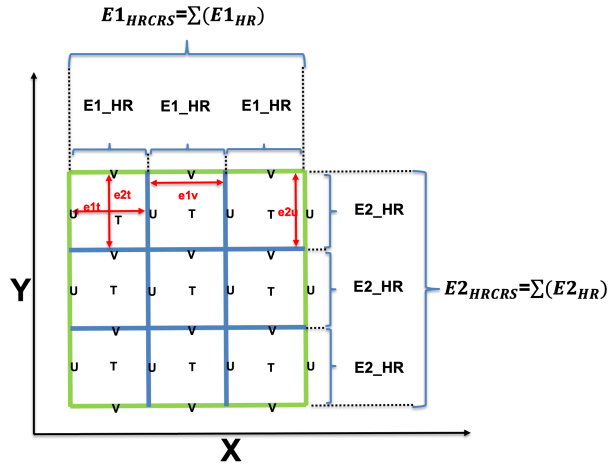

**Figure 2.** Horizontal dimensions of high-resolution ocean HR grid cells (blue lines, red arrows, with names following NEMO nomenclature) and the corresponding coarsened biogeochemical HRCRS grid cell (green lines).

### 3.1.4 Vertical dimensions

The vertical dimension of cells at T-points (usually named  $e3t$  in NEMO) are used in vertical divergence and laplacian operators throughout the biogeochemical code. For the divergence operator, it is important that the coarsening procedure preserves the HR grid volume. Hence the vertical dimension of HRCRS grid cells  $e3t_{HRCRS}$  is defined as the sum of the volume of the corresponding HR grid cells divided by the HRCRS grid cell horizontal surface area:

$$e3t_{HRCRS} = \frac{\sum_{i,j \in HR} e1t * e2t * e3t}{\sum_{i,j \in HR} e1t * e2t} \quad (4)$$

as illustrated in Figure 4 (top panels panel). Note that we assume that HR grid points which are land-masked have their vertical dimension equal to 0.

For the vertical gradient operator, the coarsening procedure must preserve the HR grid thickness. Therefore, we define another vertical dimension for HRCRS grid cells,  $e3t_{max}$ , as the maximum of the vertical dimensions of the corresponding HR grid cells:

$$e3t_{max_{HRCRS}} = \max_{i,j \in HR} e3t \quad (5)$$

as illustrated in Figure 4 (bottom panels panel).

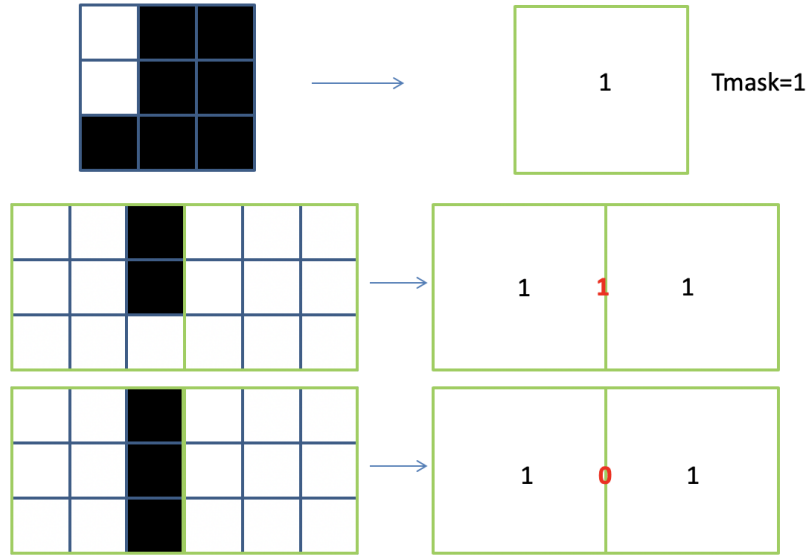

**Figure 3.** Schematic diagram illustrating the definition of land-sea mask from high resolution ocean grid cells (to the left, blue lines with land cells filled in black) to the corresponding coarsened biogeochemical grid cells (to the right, green lines, with numbers identifying whether the corresponding point, here T or U, is defined as land (0) or ocean (1)).

### 3.2 Definition of coarsening operators

185 Once the coarser grid variables have been defined, the second step of the multi-grid algorithm consists of defining the operators used to coarsen the dynamic fields necessary to solve the passive transport equation.

#### 3.2.1 Coarsening of state variables

In order to preserve conservation properties through coarsening operations, the intensive state variables (temperature, salinity) of the hydrodynamic model are coarsened such as their volume integrated quantities is the same on the finer and coarser grid.

190 Therefore, the operator is a weighted mean over the  $3 \times 3$  pad of HR cells corresponding to each HRCRS cell, where the weights are defined as the volume of the HR grid cells:

$$X_{HRCRS} = \frac{\sum_{i,j} e1t_{HR} * e2t_{HR} * e3t_{HR} * X_{HR}}{\sum_{i,j} e1t_{HR} * e2t_{HR} * e3t_{HR}} \quad (6)$$

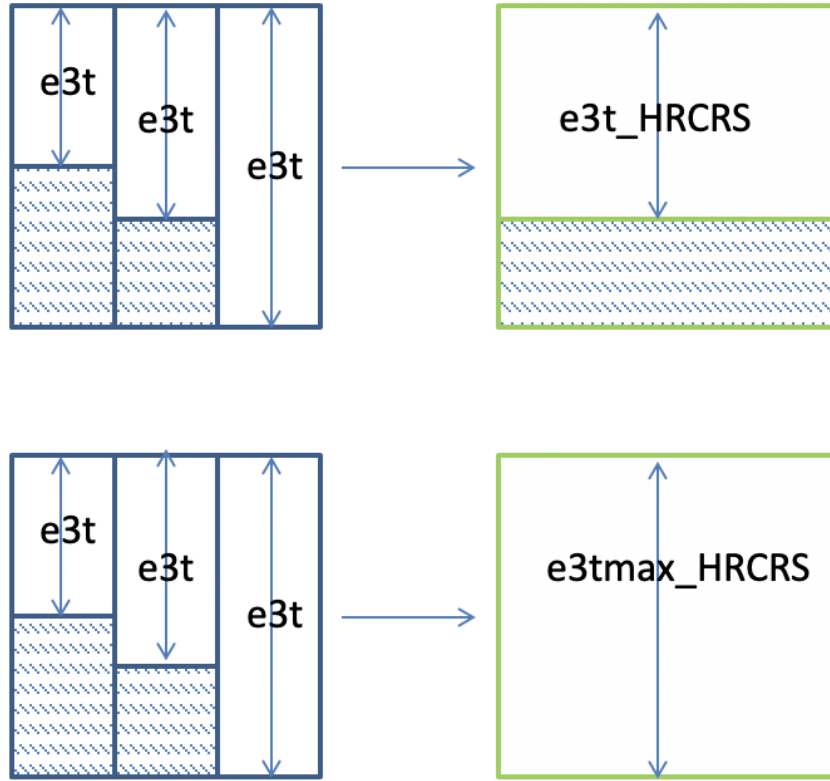

**Figure 4.** Schematic diagram illustrating the coarsening procedure for the vertical dimension ( $e3t$ ) of grid cells, from high resolution ocean grid cells (blue lines, left panels) to the corresponding coarsened biogeochemical grid cells (green lines, right panels).

In order to preserve the non-divergence of velocities on the coarser grid, HRCRS velocities are computed so as to conserve horizontal fluxes at the edges of the cells. Hence, the horizontal velocities are coarsened using a weighted mean along the edges of the  $3 \times 3$  pad of HR cells corresponding to each HRCRS cell, where the weights are defined as the area of the vertical faces of the HR grid cells:

$$X_{HRCRS} = \frac{\sum_l e12_{HR} * e3x_{HR} * X_{HR}}{\sum_l e12_{HR} * e3x_{HR}} \quad (7)$$

where  $e12_{HR} = e2u_{HR}$ ,  $e3x_{HR} = e3u_{HR}$  and  $l = j$  for zonal velocities, and  $e12_{HR} = e1v_{HR}$ ,  $e3x_{HR} = e3v_{HR}$  and  $l = i$  for meridional velocities. Note that it is the effective horizontal velocities that are coarsened to HRCRS, ie including eventual sub-grid-scale parametrizations, rather than the eulerian velocities.

Vertical velocities and surface fluxes are coarsened using a weighted mean over the  $3 \times 3$  pad of HR cells corresponding to each HRCRS cell, where the weights are defined as the horizontal area of HR grid cells:

$$X_{HRCRS} = \frac{\sum_{i,j} e1t_{HR} * e2t_{HR} * X_{HR}}{\sum_{i,j} e1t_{HR} * e2t_{HR}} \quad (8)$$

### 3.2.2 Quantities related to the equation of state

205 Quantities related to the equation of state have a substantial impact on the model stability, via stratification. Therefore, it is necessary to define conscientiously the coarsening procedure of those, so as to prevent the multi-grid algorithm from generating spurious numerical instabilities.

The  $N^2$  buoyancy frequency in the HRCRS domain is computed by coarsening the HR  $N^2$  buoyancy using the mean operator (6), a solution that is considerably cheaper than computing HRCRS  $N^2$  in the HRCRS domain. In parallel, the density  
210 in the HRCRS domain is computed from the temperature and salinity fields in the HRCRS domain. Finally, both the buoyancy frequency and density in HRCRS domain are used to compute the HRCRS slopes for neutral surfaces  $R$ . This ad-hoc solution (note that there is no well defined coarsening operator for a slope) was found to yield less numerical instabilities than others.

### 3.2.3 Sub-grid-scale vertical processes

Vertical processes affecting passive tracers are predominantly led by vertical mixing thus are very sensible **sensitive** to its  
215 amplitude. The vertical mixing coefficient  $A^v$  has minimal background values of the order of  $1.e-5 \text{ m}^2.s^{-1}$  or less, but can reach up to  $10 \text{ m}^2.s^{-1}$  or more at sporadic grid points (when static instability occurs and the parametrization for convection is activated, for example). As a consequence, using a simple weighted mean of the HR  $A^v$  as coarsening procedure, is expected to be inappropriate. Indeed, with such a method, HRCRS  $A^v$  would be exclusively reflecting occurrences of strong values of HR  
220  $A^v$ , whether they are adjacent to lower ones or not. Henceforth, we define 6 different operators to coarsen the vertical mixing coefficient and test the sensitivity of the multi-grid algorithm to those (see section 5.3.1):

- the MIN and MAX operators, where the coarsened  $A^v$  is the minimum or, respectively, the maximum of the HR  $A^v$  over the  $3 \times 3$  pad of HR cells corresponding to each HRCRS cell;
- the MEAN operator, where the coarsened  $A^v$  is computed by a weighted mean in a  $3 \times 3$  pad of HR  $A^v$  (ie the method expected to be inappropriate);
- 225 – the MEDIAN operator, where the coarsened  $A^v$  is the median value in a  $3 \times 3$  pad of HR  $A^v$ ;
- the MEANLOG operator, where the coarsened  $A^v$  is computed by a weighted mean in logarithmic space in a  $3 \times 3$  pad of HR  $A^v$ .

### 3.3 Practical implementation in NEMO ocean model

By default (i.e without using **the** multi-grid algorithm), the model passive transport component uses the grid and dynamic  
230 variables computed by the dynamic component of the code (i.e on the HR grid). It is necessary to implement the multi-grid  
algorithm for passive tracer transport in the NEMO OGCM without cancelling the default option. We describe here how the  
model passive transport component can switch to the HRCRS grid and dynamic variables when the multi-grid algorithm is  
activated.

First we present how we manage the domain loop indices. The loops in the ocean dynamic and passive transport compo-  
235 nents uses the domain sizes in the three spatial directions (called  $(jpi, jpj, jpk)$  in NEMO). When the multi-grid algorithm  
is activated, HR grid sizes  $(jpi, jpj, jpk)$  are saved in other variables  $(jpi_{HR}, jpj_{HR}, jpk_{HR})$  and HRCRS coarsened grid  
sizes are defined as  $(jpi_{HRCRS}, jpj_{HRCRS}, jpk_{HRCRS})$ . When the code is in the ocean dynamic component, the loop sizes  
 $(jpi, jpj, jpk)$  are set to HR grid sizes  $(jpi_{HR}, jpj_{HR}, jpk_{HR})$ . When the code enters the passive transport component, the  
loop sizes  $(jpi, jpj, jpk)$  switch to HRCRS grid sizes  $(jpi_{HRCRS}, jpj_{HRCRS}, jpk_{HRCRS})$ ; when the code goes out of the  
240 passive transport component, the loops sizes  $(jpi, jpj, jpk)$  switch back to HR grid sizes:

---

**Algorithm 1** Algorithm to switch domain loop indices from finer to coarser grid

---

#### Initialization

...

Define HR grid sizes :  $(jpi_{HR}, jpj_{HR}, jpk_{HR})$

Define HRCRS grid sizes :  $(jpi_{HRCRS}, jpj_{HRCRS}, jpk_{HRCRS})$

Define loop indices for whole code :  $(jpi, jpj, jpk)$

...

#### Step

...

$(jpi, jpj, jpk) = (jpi_{HR}, jpj_{HR}, jpk_{HR})$

#### CALL DYNAMIC component

...

Switch to HRCRS :  $(jpi, jpj, jpk) = (jpi_{HRCRS}, jpj_{HRCRS}, jpk_{HRCRS})$

#### CALL PASSIVE TRACER component

Switch to HR :  $(jpi, jpj, jpk) = (jpi_{HR}, jpj_{HR}, jpk_{HR})$

...

---

Secondly, we present how we manage the grid and dynamic variables used in the passive transport component. They are  
called to memory **made available** through pointers defined in an interface between the dynamical and passive transport compo-  
nents (called *oce\_trc* in NEMO GCM):

To avoid the duplication of coarsened and non coarsened grid and dynamic variables in the passive transport routine, the  
245 pointers target the coarsened grid and dynamic variables when the multi-grid algorithm is activated and the non coarsened



---

**Algorithm 2** Algorithm to link velocities in passive tracer transport component

---

**MODULE** *passive tracer*

USE *oce\_trc*, ONLY: U,V,W !interface between dynamic and passive transport components

**CONTAINS**

**SUBROUTINE** *operator\_passive\_tracer*

...

$X = \text{operator}(U, V, W)$

...

**END SUBROUTINE** *operator\_passive\_tracer*

**END MODULE** *passive\_tracer*

---

variables when it is not activated. The choice between the two definitions is done at the pre-compilation stage of the code with a cpp key *key\_crs*:

---

**Algorithm 3** Algorithm to avoid duplication in passive transport routines

---

**if defined** *key\_crs* ! multi algorithm activated:

target are coarsened (HRCRS) velocities

declared in coarsened variables module:

USE *crs*, ONLY:  $U \Rightarrow U_{HRCRS}, V \Rightarrow V_{HRCRS}, W \Rightarrow W_{HRCRS}$

**else** ! multi-grid algorithm not activated:

target are non coarsened (HR) velocities

declared in *oce* module:

USE *oce*, ONLY:  $U \Rightarrow U, V \Rightarrow V, W \Rightarrow W$

**endif**

---

## 4 Experimental protocol

250 The multi-grid algorithm has been implemented in NEMO GCM (Madec (2008)) version 3.6 in which the OPA ocean model is coupled to LIM3 sea ice model (Rousset et al. (2015), Vancoppenolle et al. (2009)) and its passive tracer transport component TOP.

Three different global ocean configurations have been employed to assess the multi-grid algorithm:

- 255 – the HR configuration, where the ocean hydrodynamic (ie open ocean and sea ice) and the passive tracer components are both running at  $1/4^\circ$  resolution. This is the reference experiment using the highest possible resolution and no multi-grid algorithm for passive tracers.
- the LR configuration, where the ocean hydrodynamic and the passive tracer components are both running at  $3/4^\circ$  resolution. This experiment provides insights on the impact of horizontal resolution with still no multi-grid algorithm for passive tracers.
- 260 – the HRCRS configuration, where the ocean hydrodynamic component is running at  $1/4^\circ$  resolution while the passive tracer is running at  $3/4^\circ$  resolution. This experiment corresponds to the standard use of multi-grid algorithm for passive tracers.

It is important to state upfront that it is not expected that the HRCRS configuration yields exactly the same results as the HR ~~or~~ LR configurations. Indeed, as there is some information missing in the coarsening procedure of ocean hydrodynamics from HR to HRCRS, the passive tracer distribution in HRCRS is not expected to be strictly the same as that in HR configuration. On the other hand, because the hydrodynamics in LR is running at coarser resolution than that in HRCRS, it is not expected that the passive tracer distribution in HRCRS is the same as that in LR. Yet, the multi-grid algorithm will be proven useful if the results of HRCRS are closer to HR than those of LR. Hence the present experimental protocol should not be seen as a direct validation of the multi-grid algorithm, but rather as an assessment of its potential benefits and limitations.

#### 270 4.1 Model configurations

The  $1/4^\circ$  configuration is described in Barnier et al. (2006). The  $3/4^\circ$  configuration coordinates and bathymetry are built by applying on  $1/4^\circ$  configuration coordinates and bathymetry the coarsening operators described above. This operation has created some fake straits in Panama and the Indonesian Trough Flow Throughflow, which have been manually filled. The  $3/4^\circ$  configuration is closed to the global Ocean ORCA  $1^\circ$  configuration used in various CMIP5 (Voltaire et al. (2013)) and CMIP6 275 models (Voltaire et al. (2019)).

The  $1/4^\circ$  and  $3/4^\circ$  resolution configurations are based on a quasi isotropic ORCA grid (Madec and Imbard (1996)) at nominal  $1/4^\circ$  and  $3/4^\circ$  horizontal resolution, respectively, at the equator. Vertical discretization uses 75 z-levels with partial cell parametrization (Barnier et al. (2006)), which leads to a resolution ranging from 1 meter at the surface to 450 meters at depth.

280 The bathymetry is based on a combination of ETOPO1 (Amante and Eakins (2009)) and GEBCO08 (Becker et al. (2009)). The initial state for the ocean is at rest, with temperature and salinity from WOA13 (World Ocean Atlas / www.nodc.noaa.gov). At the surface, the model is forced by ERAinterim atmospheric reanalysis (Dee et al. (2011)) using the CORE bulk formulae (Large and Yeager (2004)) to compute the turbulent air-sea fluxes. A monthly runoff climatology is built and applied to all configurations, using data for coastal runoffs and major rivers from Dai and Trenberth (Dai and Trenberth (2002)).

| resolution | viscosity: $B_o^l$ (m <sup>4</sup> /s) | diffusion: $A_o^l$ (m <sup>2</sup> /s) |
|------------|----------------------------------------|----------------------------------------|
| 1/4°       | -3.2e11                                | 300.                                   |
| 3/4°       | -86.4e11                               | 900.                                   |

**Table 1.** Horizontal eddy viscosity and diffusivity values at the Equator.

285 A split-explicit time-splitting scheme is employed to compute the surface pressure gradient with a non-linear free surface (Levier et al. (2007)). These parametrizations were already used in the Irish-Biscay-Iberian regional configuration, described in Maraldi et al. (2013).

The momentum advection term is computed with the energy and enstrophy conserving scheme proposed by Arakawa and Lamb (Arakawa and Lamb (1981)). The advection of tracers (temperature and salinity) is computed with a total variance 290 diminishing (TVD) advection scheme (Lévy et al. (2001), Cravatte et al. (2007)).

Lateral eddy viscosity is computed with a biharmonic operator and lateral eddy diffusivity is computed with an isopycnal laplacian operator for both active and passive tracers. As explained in Madec (2008) (section 9.1), lateral eddy diffusivity coefficient  $A^l$  decreases proportionally to the grid size, while the lateral eddy viscosity coefficient  $B^l$  decreases poleward as the cube of the grid cell size:

$$295 \quad A^l = \frac{\max(e1, e2)}{e_{max}} A_o^l \quad (9)$$

$$B^l = \frac{\max(e1, e2)^3}{e_{max}^3} B_o^l \quad (10)$$

where  $A_o^l$  and  $B_o^l$  are the respective values at the Equator (see table Table 1) while  $e_{max}$  is the maximum of e1 and e2 taken over the whole masked ocean domain **located at the Equator for global configurations**. The lateral eddy diffusivity coefficients 300 shown here are used for active tracers when the grid multi-grid algorithm is activated or not, and used for passive tracers when the grid multi-grid algorithm is not activated; the choice of lateral eddy diffusivity for passive tracers when the multi-grid algorithm is activated, is discussed later (subsection 5.2).

The vertical eddy viscosity and diffusivity coefficients are computed from a TKE turbulent closure model (Blanke and Delecluse (1993)), with parameters as described in Reffray et al. (2015).

## 305 4.2 Numerical experiments

To assess the multi-grid algorithm for passive tracers, three types of experiments have been set up. They differ on the passive tracer initial state or evolution. In all cases, the dynamical component is the same. ~~The duration of all experiments is 365 days.~~ **The comparisons of the simulated tracer distributions are performed after 365 days of integration. At this stage, tracer fields**

310 have been transported and stirred during several mesoscale eddy turnover time-scales, although tracer distributions are still far from statistical equilibrium.

In the PATCH experiments, the multi-grid algorithm is assessed on the horizontal component of the transport equation (1). Here, the passive tracer vertical eddy diffusivity component is set to 0 ( $A^v = 0$ ). The passive tracer  $C$  is initialized with a patch of  $10^\circ$  radius centered on  $60^\circ$  West /  $36^\circ$  North (see top left panel in Figure 6). The value of the tracer ranges from 2 at its center to 1.368 at its boundaries and is vertically uniform. Outside of the patch, the tracer initial value is set to 1. The tracer has no sources nor sinks. Hence the passive tracer evolution in the PATCH experiment can be described by the following equations:

$$\left\{ \begin{array}{l} \frac{\partial C}{\partial t} = -\nabla \cdot (C\vec{V}) + \nabla \cdot (A^l R \nabla C) \\ C(t=0) = \text{PATCH} \end{array} \right. \quad (11)$$

where  $R$  is a tensor of iso-neutral slopes.

320 The AGE-ZDIF experiments are conceived to assess the multi-grid algorithm on the vertical eddy diffusive component of the passive tracer transport equation (1). Hence the advection and lateral diffusion are unplugged for the passive tracer. This experiment makes use of the so-called Age tracer of NEMO GCM: its initial value is set to zero in all the ocean and its value is damped to 0 at the ocean surface while there is a net source in the ocean interior. This tracer gives a good representation of the time evolution of a water mass, after it was in contact with the Ocean surface; hence it gives some information on the ventilation of water masses. The tracer evolution in the AGE-ZDIF experiment can be described by the following equations:

$$\left\{ \begin{array}{l} \frac{\partial C}{\partial t} = \frac{\partial(A^v \frac{\partial C}{\partial z})}{\partial z} + \text{Sources} \\ \text{Sources}(t > 0) = 1 \\ C(t=0) = 0. \\ C(z=0) = 0. \end{array} \right. \quad (12)$$

325 Finally, the multi-grid algorithm is assessed on the full tracer transport equation (1) in the AGE-FULL experiment which also uses the Age tracer, but retaining all terms for the tracer transport equation. Hence the tracer evolution in the AGE-FULL experiment can be described by the following equations:

$$\left\{ \begin{array}{l} \frac{\partial C}{\partial t} = -\vec{V} \cdot \nabla C + \nabla \cdot (A^l R \nabla C) + \frac{\partial(A^v \frac{\partial C}{\partial z})}{\partial z} + \text{Sources} \\ \text{Sources}(t > 0) = 1 \\ C(t=0) = 0. \\ C(z=0) = 0. \end{array} \right. \quad (13)$$

## 5 Results

### 5.1 Coarsened velocities

Advection by ocean currents is one of the main drivers of the evolution of passive tracers. As a consequence, it is important that tracer transport by ocean currents on the coarsened grid HRCRS remains close to that on the HR grid. This implies that coarsened velocities share similarities with HR velocities on the spatial scales that are common. To test this, coarsened velocities are compared to HR velocities and LR velocities (Figure 5), as done by Lévy et al. (2012) in a more idealized context.

Power spectra are computed along the horizontal coordinates of the model grids. For each spectrum, the minimum wavelength corresponds to twice model grid spacing:  $2 * \Delta x$ . HRCRS velocities are the result of the coarsening of HR velocities on LR grid. As HR grid is finer than LR grid, HR velocities contains finer scales than HRCRS and LR.

In terms of kinetic energy, vertical velocities and relative vorticity, HR, HRCRS and LR have almost the same level of energy at spatial scales larger than 250 km. At smaller spatial scales, HRCRS has a level of energy comparable to HR in terms of kinetic energy and relative vorticity while vertical velocities are less energetic than in HR. For the 3 quantities, at spatial scales smaller than 250 km, the level of energy of LR is significantly below HR and HRCRS levels. This suggests that ocean currents in HRCRS are, overall, more similar to those in HR than to those in LR.

### 5.2 Horizontal tracer transport

The evaluation of the multi-grid algorithm to resolve an advection-diffusion problem is shown here with the results of the PATCH experiment described in section subsection 4.2.

The first step is to evaluate the best value for the passive tracer horizontal diffusion coefficient in the HRCRS configuration. A comparison between HR and various HRCRS configurations differing for their horizontal diffusion coefficient (set to 300, 600, 900 and 1200  $\text{m}^2/\text{s}$ ) is presented in appendix Appendix A. This sensitivity test suggests that 900  $\text{m}^2/\text{s}$  yields the best results for HRCRS. Using 300  $\text{m}^2/\text{s}$  in HR and 900  $\text{m}^2/\text{s}$  in HRCRS for the passive tracer lateral diffusion respects the ratio in spatial resolution between the two configurations (of respectively  $1/4^\circ$  and  $3/4^\circ$  nominal resolution), which is consistent with the linear relationship between the horizontal diffusion coefficient  $A^l$  and the cell size (see Equation 9).

Using this value for the lateral diffusion coefficient  $A^l$  in the HRCRS configuration, and comparing outputs to those from HR and LR configurations, suggests that the HRCRS patch is closer to the HR shape than to the LR one (Figure 6). Indeed, LR has a larger area where its concentration is higher than in HR, with a difference greater than 0.3 in its center, while the difference between HRCRS and HR does not exceed 0.2 (within the red box, after one year of simulation, RMSE is 0.04 between HRCRS and HR and 0.09 between LR and HR).

~~Horizontal resolution plays an important role on the horizontal velocities, that influences the interior EKE distribution and so the tracer distribution~~ Horizontal velocities influence the interior EKE distribution and so the tracer distribution. In Figure 7, we represent for a meridional section in the Gulf stream the daily vertical distribution of zonal velocities and PATCH tracer after one year of simulation, for the HR, HRCRS and LR configurations. The HRCRS velocities are obtained by coarsening the HR velocities. HR and HRCRS zonal velocities are stronger than LR velocities and present more fine structures, in particular

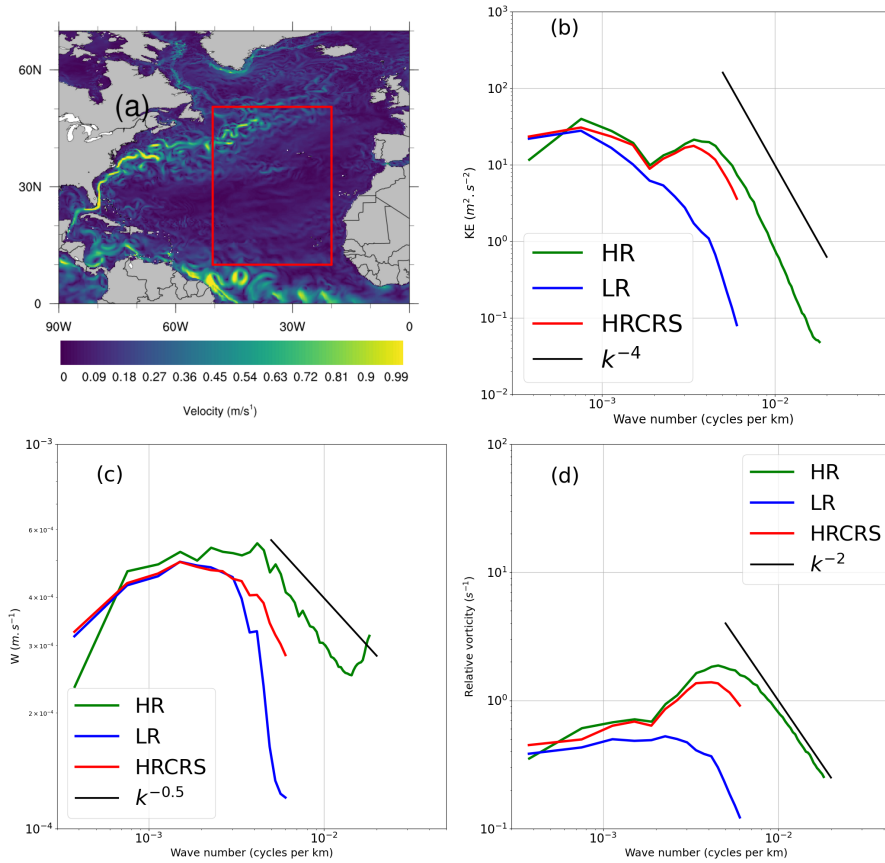

**Figure 5.** North Atlantic yearly mean surface current speed (a) and power spectrum density of (b) surface kinetic energy, (c) vertical velocities and (d) surface vorticity as functions of spatial wave number, in configurations HR (green lines), LR (blue lines) and HRCRS (red lines). Black lines in spectra represent usual slopes to be compared with numerical spectra. All computations use daily model outputs and yearly averaged.

in the northern region ( above 40° North). HRCRS and HR tracer distribution are similar and present some differences to LR configuration. In the southern part of the 55°W sections, LR configurations has a maximum of concentration, whereas HRCRS and HR have lower values. In the northern parts of the section, HR and HRCRS have some higher values of concentration in the interior and deeper ocean than in LR configuration, around 40°N latitude. Despite the degraded spatial resolution degradation operated on the velocities, the dynamics used to transport HRCRS tracer present the same pattern as the HR dynamics. The tracer using the multi-grid algorithm reproduces the the HR tracer; while the dynamics is coarsened, the HRCRS tracer benefits from the higher resolution dynamics and present a gain compared to a lower resolution experiment.

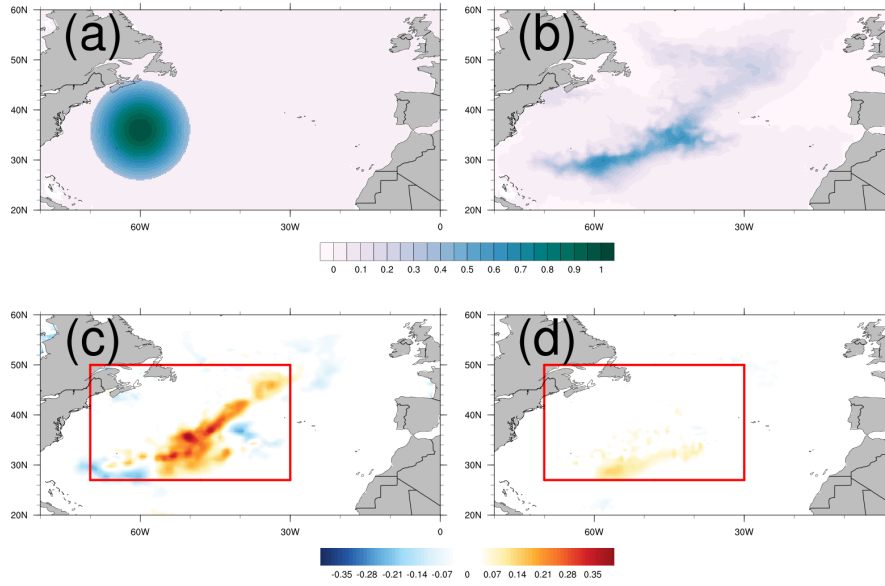

**Figure 6.** Passive tracer Initial condition for PATCH experiment (a), tracer concentration at 16 m depth after one year for HR configuration (b) and difference with respectively LR (c) and HRCRS configurations (d).

### 5.3 Vertical diffusion

#### 370 5.3.1 Choice of vertical diffusion on the coarsened grid

Vertical mixing is responsible of for the ventilation of a passive tracers and thus its vertical distribution. The vertical diffusion coefficient  $A^v$  is computed by the dynamic component (so on the HR grid) and but it might computed be coarsened on the HRCRS grid.

Here we present the results of the AGE-ZDF experiment in order to assess the capacity of the multi-grid algorithm to simulate  
 375 the passive tracer vertical mixing. In particular we show the sensitivity of the Age tracer vertical representation to the choice of coarsening operator of the vertical mixing parameter  $A^v$  presented in section section 3.2.4.

The top figures in Figure 8 present the daily vertical profiles of rms difference to the HR Age tracer after one year of simulation. All the configurations have the same shape of vertical distribution, except LR and HRCRS with MAX operator which have a behaviour very different to the others at the bottom of the Ocean. The top right panel in Figure 8 presents a zoom in  
 380 the first 500 meters. All the configurations have some differences in the mixed layer and some HRCRS configurations are closer to HR, according to the coarsening operator used for the vertical mixing: the HRCRS with MEANLOG and MEDIAN operators give the best performances compared to HR experiment, whereas the HRCRS experiments with the 2 extreme operators gives the worst results with LR results less comparable to LR.

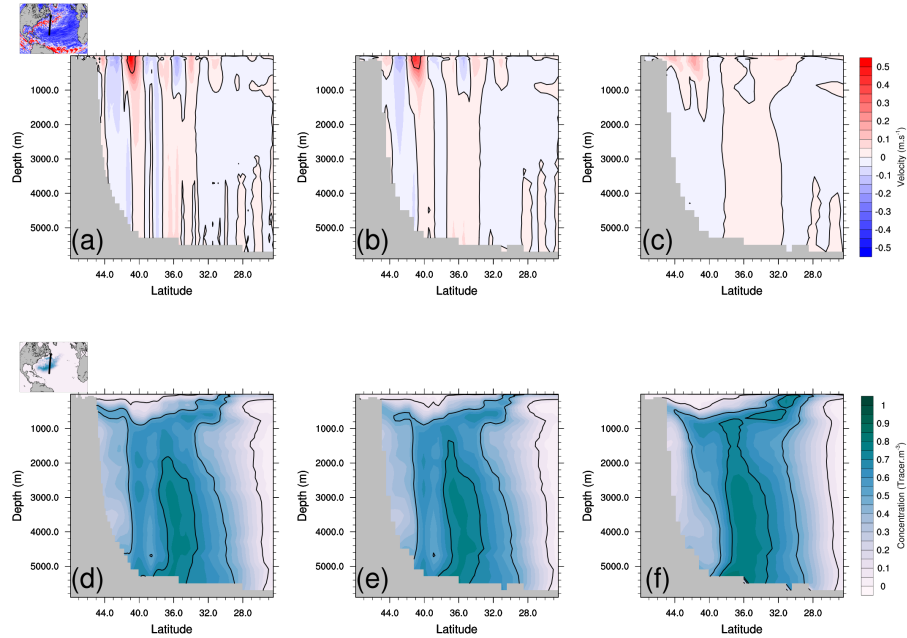

**Figure 7.** Vertical distribution of the zonal velocities ( $m/s$ ) (top) and PATCH tracer (bottom) for HR (a,d), HRCRS (b,e) and LR (c,f) configurations along  $55^{\circ}W$  section in Gulf stream.

| configuration      | RMSE  |
|--------------------|-------|
| LR                 | 17.72 |
| HRCRS with MIN     | 14.40 |
| HRCRS with MEANLOG | 10.00 |
| HRCRS with MEAN    | 12.03 |
| HRCRS with MEDIAN  | 10.46 |
| HRCRS with MAX     | 42.16 |

**Table 2.** RMSE with HR solution, after one year of simulation.

Table 2 gives the RMSE with HR solution for all HRCRS experiments and LR. The HRCRS with MEANLOG and MEDIAN operators gives the best results. HRCRS with MIN and HRCRS with MEAN have a better skill than LR and HRCRS with MAX is far from the other simulations.

To understand which process leads to these solutions, we present on Figure 8 bottom figures the divergence of the age tracer vertical diffusive fluxes averaged over the global Ocean and the first year of the simulation. A positive divergence means that the net incoming fluxes are positives. Looking at the flux to the bottom (bottom right plot) shows that the divergence is negative for HRCRS with MAX operator; it is coherent with the fact that Age tracer concentration is lower than the other (see



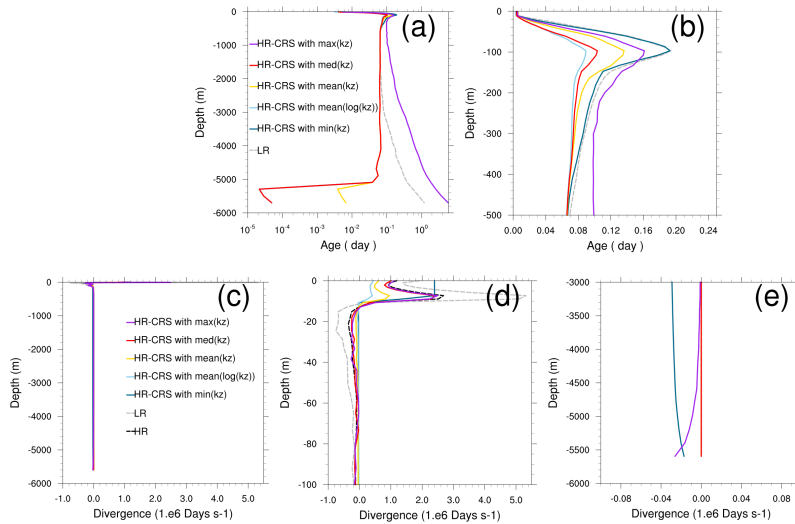

**Figure 8.** Top: RMS differences to HR Age tracer for HRCRS & LR runs for the whole water column (a) and for the first 500 meters (b). Age Tracer values are instantaneous outputs after one years. Bottom: Horizontal mean of divergence of Age tracer vertical diffusive fluxes mean over the first year for the whole water column (c), the top ocean (d) and the bottom ocean (e).

top left plot). It is explained by the fact that the MAX operator extends the zone where the  $A^v$  has high value along the bathymetry. HRCRS with MIN operator has a negative flux divergence at the bottom, but its Age value is closer to HR.

### 5.3.2 Special case for convection

Here we propose to assess the multi-grid algorithm to simulate the age tracer penetration for deep convection as in Ross and Weddel seas. Here we assess the multi-grid algorithm at simulating the age tracer penetration for deep convection as in the Ross and Weddel seas. We want to know if the operators selected in the previous section (MEANLOG and MEDIAN) are appropriate for this particular situation.

Figure 9 represents the depth where the Age tracer reaches the value of 10 days (top) and 100 days, along a section in the Austral Ocean, at the latitude of  $58.3^\circ$  south. On the two plots on the left, we compare the HR profile (black), the LR experiment (grey) and the ensemble spread of the different solutions of HRCRS (light blue). The HR profile is included in the HRCRS ensemble, whereas the LR experiment is outside of the HRCRS spread. All the HRCRS solutions have better performances than the LR solution compared to HR. However, the spread is larger in two areas, between  $140^\circ$ W and  $80^\circ$ W and between  $100^\circ$ E and  $160^\circ$ E.

The 2 plots on the right of Figure 9 shows the differences between each HRCRS solutions and HR. We can see that, outside of the 2 areas of deep convection, the HRCRS solution performed with MEANLOG and MEDIAN operator are the closest to the HR solution, especially in the deeper case (bottom right figure). Around  $100^\circ$ E and  $150^\circ$ W, the HRCRS solution with the MIN operator is the closest to HR solution.

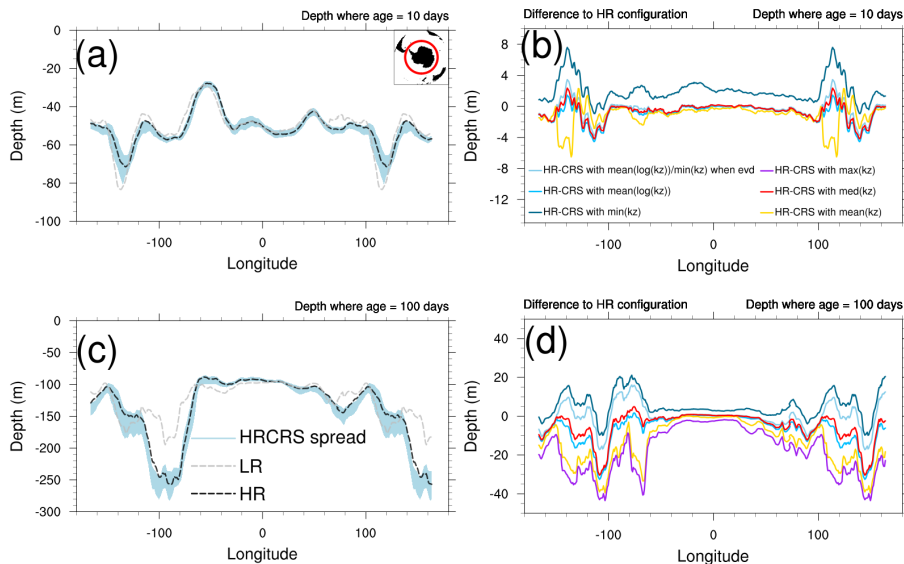

**Figure 9.** ACC section ( $-58.3^\circ$  South) of depth where age tracer value is equal to a given age: 10 days (a,b) and 100 days (c,d). (a) and (c) compare HR, LR and the mean of HRCRS runs. (b) and (d) show the difference between HR and all the HRCRS runs.

In order to combine the better performance of MIN operator in the convection situation and MEANLOG operator in the global Ocean, we add here a new operator based on MEANLOG operator with a switch to MIN operator in presence of convection. The HRCRS run with MEANLOG operator and a switch to MIN operator gives the best comparison to the HR run in the Weddel and Ross seas areas and have good performances outside.

#### 5.4 Evaluation of the full algorithm

We have validated the multi-grid algorithm to represent the tracer advection and lateral diffusion in section 5.2 and the vertical eddy diffusion in the section 5.3. The choice of the operator to coarsen the vertical diffusion coefficient  $A^v$  has also been discussed in the section 5.3. Now we present some results for the full transport equation (1). We decide to continue the assessment using the MEANLOG operator to coarsen the vertical diffusion coefficient.

A comparison of the depth for HRCRS and LR runs to HR run is presented in Figure 10. The upper figure presents the HR depths where Age is equal to 100 days. The second figure presents the depth differences between LR and HR and the last figure the depth differences between HRCRS and HR. Higher depths values are due to deeper Age tracer penetration, caused by higher vertical mixing. Globally, there are no big differences between the 3 runs, excepted in the area where mesoscale activity is important: the Gulf Stream, the North Atlantic subpolar gyre, the Kuroshio and the Austral Ocean. The differences between HRCRS and HR runs are largely weaker than the differences between LR and HR runs.

In order to compare on depth the three different runs, we present in Figure 11 the Age tracer penetration along 3 sections. The first section starts in ACC and goes northward until North Atlantic. For a value of 10 days, the penetration for the 3 experiments

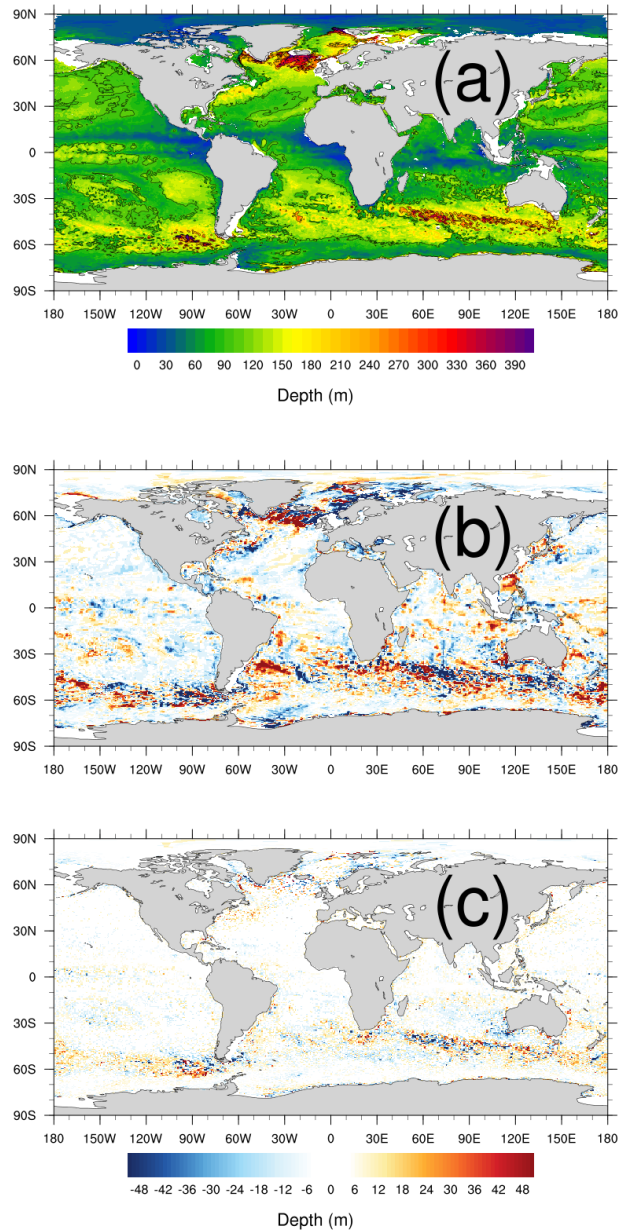

**Figure 10.** Depth where age tracer is equal to 100 days, after one year of simulation: HR experiment (a), LR minus HR (b) and HRCRS minus HR (c).

425 are close. For a value of 100 or 300 days, HRCRS is very close to HR run and LR is different from the 2 others experiments. The second section goes along the Equatorial Pacific. For the 3 values of Age Tracer, the corresponding depth from HR and

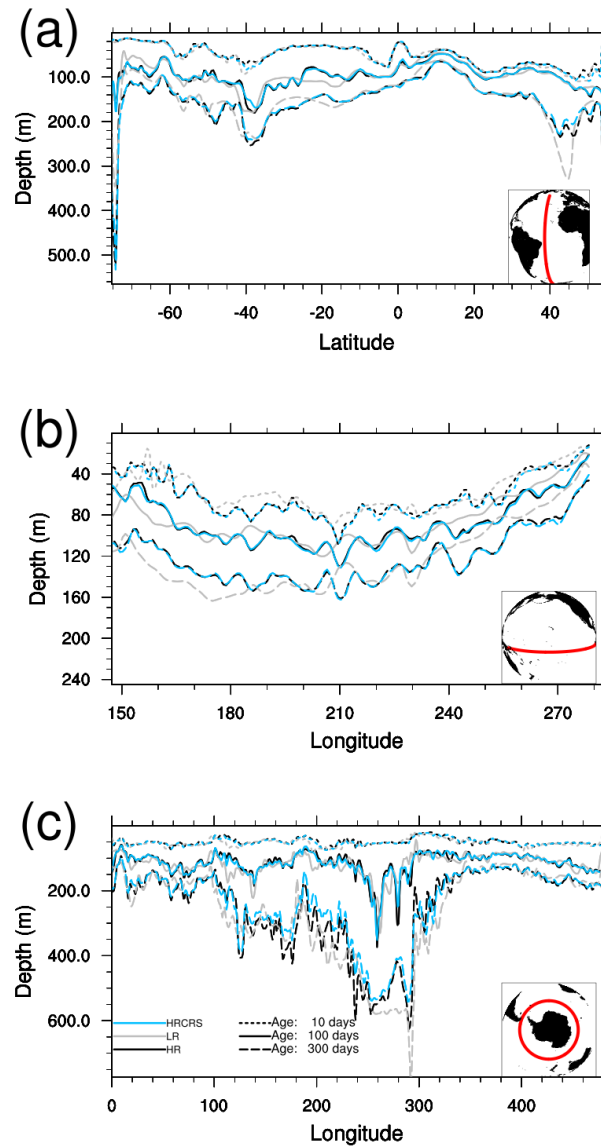

**Figure 11.** Atlantic (a), Pacific (b) and ACC (c) sections of Age tracers after one year of simulation for HR (black), LR (grey) and HRCRS (blue) configurations. Age value is 10 days (dashed line), 100 days (solid line) and 300 days (dashed line).

HRCRS are very close and the depths from the LR experiment are different. The last section is inside the Antarctic Circumpolar Current. HRCRS and HR depths are similar for 10, 100 and 300 days. LR run depths are similar to the 2 other runs for 10 days, and the differences with the 2 other runs increase with depth.

|               |      |       |
|---------------|------|-------|
| configuration | LR   | HRCRS |
| RMSE          | 2.30 | 0.91  |

**Table 3.** RMSE with HR solution, after one year of simulation.

| configuration                          | HR    | HRCRS |
|----------------------------------------|-------|-------|
| tracer transport module (for 1 tracer) | 168.  | 18.7  |
| coarsening module                      | -     | 220.  |
| total for 1 tracer                     | 168.  | 238.7 |
| total for 24 tracers                   | 4032. | 668.  |

**Table 4.** Elapsed time (in second) for a 1 month run with/without without/with the multi-grid algorithm. The values in the last column row have been extrapolated.

430 The Age tracer RMSE with HR solution has a value of 0.91 for HRCRS and 2.30 for LR, after one year of simulation (Table 3).

### 5.5 Computational performance

Because of the extra computational cost of the coarsening of dynamical fields, the multi-grid algorithm procedure gives better performances **only** with large numbers of passive tracer fields. Indeed, the expected speed-up for computing tracer advection  
435 on a 3x3 coarser resolution grid is a priori a factor 9. However, in practice, the time spent for defining the grid and computing dynamical fields on the coarsened grid should also be accounted for. We present in Table 4 the elapsed time spent by the HR run (without grid coarsening capacity) and HRCRS run (with grid coarsening capacity). The elapsed time spent defining the scale factors for coarsened grid and computing the dynamic fields on the coarsened grid is actually significant. This is why, for a single tracer field, the HRCRS run (with grid coarsening capacity) uses more CPU resources than the HR run. But it should  
440 be noted that the definition of the **coarsened** grid and **coarsened** and the **coarsening of** dynamical fields is **are** only done once for all the tracer fields. Therefore the net overhead cost of this extra operation is relatively small in situations with many tracer fields (as shown in the last column row of Table 4).

Overall, we estimate that using the multi-grid algorithm allows **us** to reduce the cost of running a full ocean model with an interactive biogeochemical component by a factor  $\sim 3$ . Table 5 provides an estimate of the breakdown of elapsed time in  
445 a global NEMO configuration coupled to PISCES biogeochemical model (Aumont et al. (2015)), which simulates 24 passive tracers. Typically, running NEMO biogeochemical transport module (TOP) for 24 tracers on the same grid as the dynamics requires twice as much resources **than** **as** the ocean/sea-ice component. PISCES biogeochemical component itself uses resources comparable to those used for the ocean/sea-ice component. Running a full model with a biogeochemical component based on PISCES typically requires 4 times the resources of the ocean/sea-ice component alone. Given the figures of **table** Table 4,  
450 we estimate that the net elapsed time overhead of the biogeochemical component (transport + PISCES) would be reduced by

| configuration         | HR | HRCRS | speedup ratio |
|-----------------------|----|-------|---------------|
| ocean and sea ice     | 1. | 1.    | 1.            |
| coarsening operation  | 0. | 0.12  | -             |
| BGC tracers transport | 2. | 0.22  | 9.            |
| BGC model             | 1. | 0.11  | 9.            |
| overhead of BGC       | 3. | 0.45  | 6.7           |
| total                 | 4. | 1.45  | 2.8           |

**Table 5.** Typical expected speedup in elapsed time between a run with versus without ~~without versus with~~ multi-grid algorithm. Values have been extrapolated from the measured cost of the coarsening operation and an estimate of the net overhead of PISCES biogeochemical model.

a factor  $\sim 7$  with the multi-grid algorithm. Therefore, a full model using our multi-grid algorithm would use 1.45 times the resources ~~than~~ the ocean/sea-ice component alone, therefore reducing the cost of the overall system by a factor 3.

## 6 Limitations and future perspectives

A key limitation of the multi-grid algorithm described in this paper is its restriction to *odd* coarsening factors. As shown in  
455 Figure 12, two possibilities would exist for defining an averaging procedure in the case of *even* coarsening factors but none of them would be fully amenable for defining a robust coarsening procedure. On the one hand, Figure 12 shows that ~~their~~ **there** is no obvious definition for lateral fluxes at the cell boundaries if the cell resulting from the averaging of several T-cells is centered at a T-point. On the other hand, a consistent treatment of north-fold boundary condition in the HR and CRS grids requires that both grids share the same pivot point at the north-fold boundary (as described in (Madec (2008))), see in particular  
460 Fig. 8.4). This is why it is not possible to use an averaging procedure where the cell resulting from the averaging of T-cells is centered at a F-point.

The present implementation is even more limited since only a coarsening factor of 3 is allowed. This limitation is related to constraints associated with multiprocessor applications. Indeed using a larger coarsening factor would require increasing the width of MPI overlapping areas (halo ghost cells for data exchanges with neighboring processors). This is illustrated in  
465 Figure 13, which shows that using a spatial coarsening factor of 5 would require extending the MPI overlapping area with an extra grid point in each direction. But, as for NEMO3.6, the width of MPI overlapping areas is limited to one grid point in each direction.

A natural ~~perspective~~ **perspective** of this work would be to add time sub-sampling. Indeed, in its ~~the~~ present form, our multi-grid algorithm uses the same time-stepping for both the HR and CRS grids. But the integration on the CRS grid could probably  
470 be carried out with a larger time step which would further reduce the computational cost of tracer advection. As described in (Madec (2008)) section 3.2 and (Leclair and Madec (2009)), NEMO currently uses a leap-frog time-stepping scheme with a Robert-Asselin filter. In this context extending our algorithm to the discretization in time is non-trivial because it would

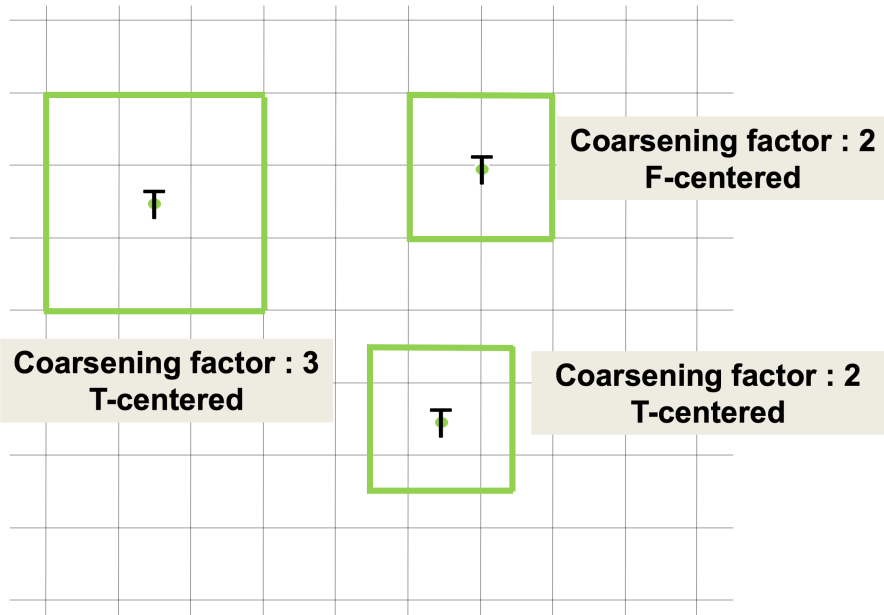

**Figure 12.** Position of coarsened cells (green) on its high-resolution grid local mpp-domain, for some odd or even coarsening factors.

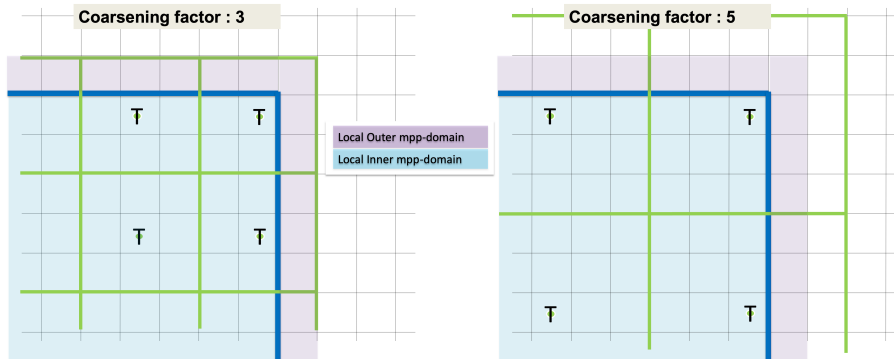

**Figure 13.** Position of coarsened cells (green) on its high-resolution grid local mpp-domain, for a 3-coarsening factor (left) and 5-coarsening factor (right).

require keeping in memory several consecutive occurrences of the prognostic variables and grid cells volumes. Allowing time coarsening would be greatly simplified with a 2 level time-stepping scheme in NEMO (which is planned for NEMO v5.0).

An algorithm based on multiple grids has been ~~proposed~~ **developed** and implemented in NEMO 3.6 ocean model for accelerating the integration of ocean biogeochemical models. The core of the algorithm is to compute the evolution of biogeochemical variables on a grid ~~which~~ **whose** resolution is degraded by a factor 3x3 with respect to the dynamical fields. We have described in detail the operators that allow ~~to~~ **the** switch from the high resolution grid (HR) to a coarser resolution grid (HR) and how to  
480 define optimally the evolution operators on the coarse grid based on information at high resolution. We have in particular described how several vertical scale factors should be introduced and described the different options for the treatment of vertical physics on the coarse grid. A series of numerical tests performed under realistic conditions has been carried out for identifying how to optimally represent vertical mixing on the coarser grid.

The solutions computed with the ~~proposed~~ full algorithm have been compared to solutions obtained using a high resolution  
485 grid for both dynamics and passive tracers (HR configuration,  $1/4^\circ$  resolution), and solutions obtained using the lower resolution grid for both dynamics and passive tracers (LR configuration,  $3/4^\circ$  resolution) in a series of global ocean model experiments. We have shown that the proposed method provides solutions at global scale that are notably improved as compared to LR solutions and comparable to HR solutions. This confirms our working hypothesis that fluctuations of dynamical quantities close to the HR grid size have negligible impact on tracer transport.

The evaluation of computational performances shows that the multi-grid approach does not reduce the computing time in the  
490 case of a single passive tracer because of the overhead associated with the definition and computation of dynamical quantities on the coarse grid. However, the reduction of elapsed time ~~can~~ **might** be substantial when the algorithm is applied to multiple tracers as in the case of a comprehensive biogeochemical models (**an estimate has been provided but not proven**). The proposed algorithm allows **us** to reduce by a factor 7 the overhead associated with running a full biogeochemical model with 24 tracer  
495 fields in NEMO simulations.

Several possible directions for **further** improving ~~further~~ the performances of the algorithm have been identified but they may require important changes to NEMO code. Increasing the width of MPI overlapping areas in NEMO would allow **us** to increase the spatial coarsening factor (now limited to 3 in the present version). In addition, the use of more selective coarsening operators (Debreu et al. (2008)) would bring the coarsened solution even ~~more close~~ **closer** to the uncoarsened solution. Their larger  
500 spatial stencil would however bring similar issues as for the coarsening factor limitation in a multi-grid processor environment. Extending our approach to the discretization in time is also a natural direction. Using a 2 level time-stepping scheme instead of the leap-frog time-stepping scheme currently used in NEMO would greatly simplify such a development. **The algorithm we propose in this article makes it possible to run global applications of complex ocean biogeochemical models at eddy resolution over several decades. By reducing the computational overhead of running complex biogeochemical components in high resolution ocean models, our algorithm opens the possibility to explicitly account for the impact of mesoscale ocean dynamics on ocean biogeochemistry in operational and climate models. The benefit of this approach in the context of climate modelling has recently been illustrated by Berthet et al. (2019).**  
505



*Code availability.* The code containing the multi-grid algorithm has been developed in the NEMO OGCM framework (<https://www.nemo-ocean.eu/>). This capacity is available on a development branch of the nemo 3.6 stable release and is available after registration at: [https://forge.ipsl.jussieu.fr/nemo/browser/NEMO/branches/2018/dev\\_r5003\\_MERCATOR\\_CRS](https://forge.ipsl.jussieu.fr/nemo/browser/NEMO/branches/2018/dev_r5003_MERCATOR_CRS). The NEMO source code is freely available and distributed under CeCILL license (GNU GPL compatible). The following cpp keys have been used to compile the code :

`key_dynspgts, key_lim3, key_vvl, key_ldfslp, key_traldf_c2d, key_dynldf_c2d, key_zdfstke, key_mpp_mpi, key_iomput, key_nosignedzero, key_top, key_my_trcandkey_xios2.`

The key `key_crs` is added to this list to activate the multi-grid algorithm.

The exact version of the model used to produce the results used in this paper is archived on Zenodo at <https://doi.org/10.5281/zenodo.3615356>, as are input data and scripts to run the model and produce the plots for all the simulations presented in this paper (citation).

*Data availability.* The model outputs used in this paper are available at <https://doi.org/10.5281/zenodo.3547421>.

## Appendix A: Sensitivity of tracer to diffusion coefficient

In a coupled ocean-biogeochemical model, where the ocean and biogeochemical components are running at the same resolution, as the HR and LR configurations, the horizontal diffusion coefficient  $A^l$  value is the same for active tracers (temperature and salinity) and the passive tracers (the biogeochemical tracers, or the PATCH tracer here). With the multi-grid capacity, passive tracers are running at a lower resolution than active tracers. We need to evaluate the best diffusion coefficient value for the passive tracers. Here we present the results of the HR and HRCRS configurations for the PATCH experiment described in section 4.2.1.

The reference diffusion coefficient  $A_o^l$  value from (9) is  $300 \text{ m}^2/\text{s}$  for HR configuration and different simulations have been performed for HRCRS configurations with values of 300, 600, 900 and  $1200 \text{ m}^2/\text{s}$  for  $A_o^l$ . The top figures in Figure A1 represent the HR solution at its resolution (left) and at the HRCRS resolution (right). The HRCRS solutions are represented above and their differences with HR in the bottom plots.

The HRCRS configurations runs with values of 300 and  $600 \text{ m}^2/\text{s}$  for  $A_o^l$  seems to be too noisy compared to the HR configuration; the maximum value of the tracer inside the patch is also too high compared to HR configuration maximum. The HRCRS configuration run with a value of  $1200 \text{ m}^2/\text{s}$  for  $A_o^l$  seems to be a little bit more diffuse compared to HR configuration and the maximum value is a little bit lower. The HRCRS configuration run with a value of  $900 \text{ m}^2/\text{s}$  gives the better reproduction to HR configuration in term of the patch distribution and fine scales representation.

Table A1 gives the RMSE with HR for all experiments in the red box. The best result is obtained with a diffusion coefficient value of  $900 \text{ m}^2/\text{s}$  and the worst with a value of  $300 \text{ m}^2/\text{s}$ . The results obtained with  $1200 \text{ m}^2/\text{s}$  are close to the best solution.

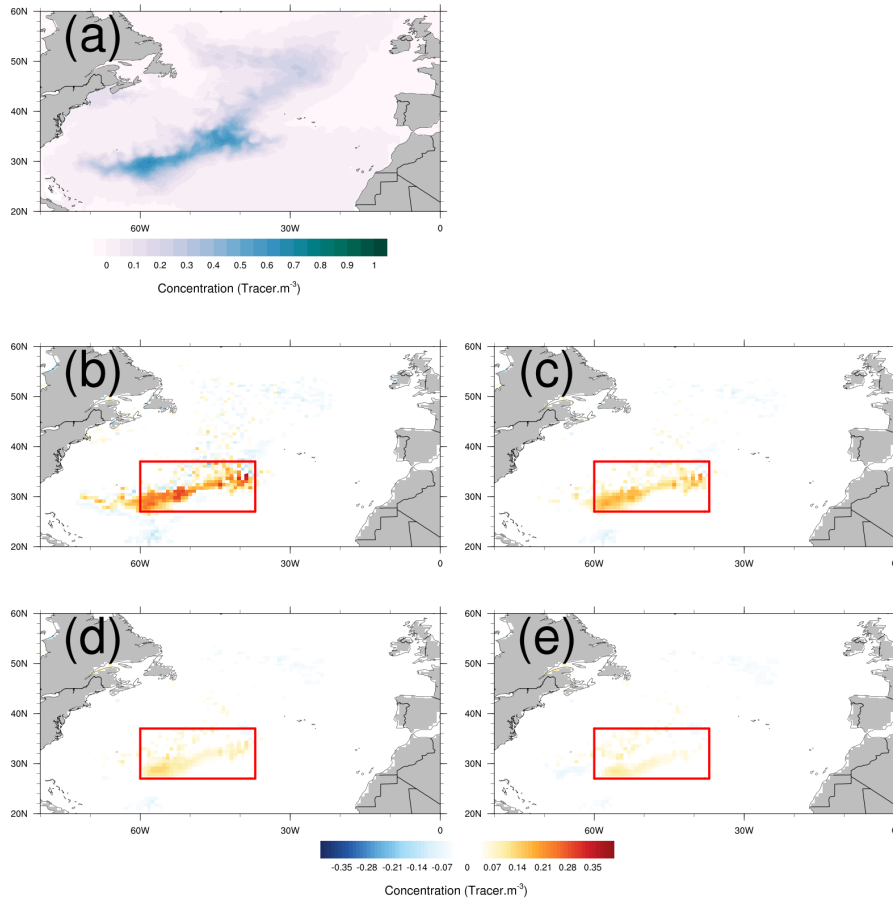

**Figure A1.** Surface values of PATCH tracer after one year for HR configuration (a); differences between HRCRS and HR configurations with diffusion=300 m<sup>2</sup>/s (b) , diffusion=600 m<sup>2</sup>/s (c), diffusion=900 m<sup>2</sup>/s (d) and diffusion=1200 m<sup>2</sup>/s (e).

| HRCRS configuration diffusion coefficient value | RMSE   |
|-------------------------------------------------|--------|
| 300 m <sup>2</sup> /s                           | 0.0823 |
| 600 m <sup>2</sup> /s                           | 0.0613 |
| 900 m <sup>2</sup> /s                           | 0.0530 |
| 1200 m <sup>2</sup> /s                          | 0.0535 |

**Table A1.** RMSE with HR solution, after one year of simulation.

*Author contributions.* Clément Bricaud, Christophe Calone, Gurvan Madec and Christian Ethe developed the model code. Clément Bricaud, Julien Le Sommer and Jérôme Chanut designed the experiments. Clément Bricaud performed the simulations. Clément Bricaud and Julien Le Sommer prepared the manuscript with contributions from Marina Levy, Julie Deshayes and Jérôme Chanut.

540 *Competing interests.* The authors declare that they have no conflict of interest.

*Acknowledgements.* The ~~developper~~ **development** of the multi-grid algorithm for passive tracers were supported by EU MyOcean and My-Ocean2 projects, the EMBRACE project (European Union's Seventh Framework Programme for research under grant agreement no 282672), then by the EU Copernicus Marine Environment Monitoring Service (CMEMS), the French ANR SOBUMS (ANR-16-CE01-0014) and the CMEMS 22-GLO-HR project. The development and the simulation shown in this paper has been produced on the ECMWF CCA Cray  
545 supercomputer.

## References

- Amante, C. and Eakins, B.: ETOPO1 1 Arc-Minute Global Relief Model: Procedures, Data Sources and Analysis, <https://doi.org/10.7289/V5C8276M>, 2009.
- 550 Arakawa, A. and Lamb, V. R.: A Potential Enstrophy and Energy Conserving Scheme for the Shallow Water Equations, *Mon. Weather Rev.*, 109, 18–36, 1981.
- Aumont, O., Orr, J. C., Jamous, D., Monfray, P., Marti, O., and Madec, G.: A degradation approach to accelerate simulations to steady-state in a 3-D tracer transport model of the global ocean, *Climate Dynamics*, 14, 101–116, <https://doi.org/10.1007/s003820050212>, <http://link.springer.com/10.1007/s003820050212>, 1998.
- Aumont, O., Ethé, C., Tagliabue, A., Bopp, L., and Gehlen, M.: PISCES-v2: an ocean biogeochemical model for carbon and ecosystem 555 studies, *Geoscientific Model Development*, 8, 2465–2513, <https://doi.org/10.5194/gmd-8-2465-2015>, <https://www.geosci-model-dev.net/8/2465/2015/>, 2015.
- Barnier, B., Madec, G., Penduff, T., Molines, J.-M., Treguier, A.-M., Sommer, J. L., Beckmann, A., Biastoch, A., Boning, C., Dengg, J., Derval, C., Durand, E., Gulev, S., Remy, E., Talandier, C., Theetten, S., Maltrud, M., McClean, J., and Cuevas, B. D.: Impact of partial steps and momentum advection schemes in a global ocean circulation model at eddy-permitting resolution., 56, 543–567, 560 <https://doi.org/10.1007/s10236-006-0082-1>, <http://dx.doi.org/10.1007/s10236-006-0082-1>, 2006.
- Becker, J. J., Sandwell, D. T., Smith, W. H. F., Braud, J., Binder, B., Depner, J., Fabre, D., Factor, J., Ingalls, S., Kim, S.-H., Ladner, R., Marks, K., Nelson, S., Pharaoh, A., Trimmer, R., Rosenberg, J. V., Wallace, G., and Weatherall, P.: Global Bathymetry and Elevation Data at 30 Arc Seconds Resolution: SRTM30\_PLUS, *Marine Geodesy*, 32, 355–371, <https://doi.org/10.1080/01490410903297766>, <https://doi.org/10.1080/01490410903297766>, 2009.
- 565 Berthet, S., Sférian, R., Bricaud, C., Chevallier, M., Voldoire, A., and Ethé, C.: Evaluation of an Online Grid-Coarsening Algorithm in a Global Eddy-Admitting Ocean Biogeochemical Model, *Journal of Advances in Modeling Earth Systems*, 11, 1759–1783, <https://doi.org/10.1029/2019MS001644>, <https://agupubs.onlinelibrary.wiley.com/doi/abs/10.1029/2019MS001644>, 2019.
- Blanke, B. and Delecluse, P.: Low frequency variability of the tropical Atlantic ocean simulated by a general circulation model with mixed layer physics, *J. Phys. Oceanogr.*, 23, 1363–1388, 1993.
- 570 Cabré, A., Marinov, I., and Leung, S.: Consistent global responses of marine ecosystems to future climate change across the IPCC AR5 earth system models, *Climate Dynamics*, 45, 1253–1280, <https://doi.org/https://doi.org/10.1007/s00382-014-2374-3>, 2015.
- Chassignet, E. P., Le Sommer, J., and Wallcraft, A. J.: General circulation models., *Encyclopedia of Ocean Sciences* (3rd edition), Elsevier, 2019.
- Cravatte, S., Madec, G., Izumo, T., Menkes, C., and Bozec, A.: Progress in the 3-D circulation of the eastern equatorial Pacific in a climate 575 ocean model, *Oceanogr. Meteorol.*, 17, 28–48, 2007.
- Dai, A. and Trenberth, K. E.: Estimates of Freshwater Discharge from Continents: Latitudinal and Seasonal Variations, *Journal of Hydrometeorology*, 3, 660–687, [https://doi.org/10.1175/1525-7541\(2002\)003<0660:EOFDfC>2.0.CO;2](https://doi.org/10.1175/1525-7541(2002)003<0660:EOFDfC>2.0.CO;2), [https://doi.org/10.1175/1525-7541\(2002\)003<0660:EOFDfC>2.0.CO;2](https://doi.org/10.1175/1525-7541(2002)003<0660:EOFDfC>2.0.CO;2), 2002.
- Debreu, L., Vouland, C., and Blayo, E.: AGRIF: Adaptive grid refinement in Fortran, *Computers and Geosciences*, 34, 8 – 580 13, <https://doi.org/https://doi.org/10.1016/j.cageo.2007.01.009>, <http://www.sciencedirect.com/science/article/pii/S009830040700115X>, 2008.

- Dee, D. P., Uppala, S. M., Simmons, A. J., Berrisford, P., Poli, P., Kobayashi, S., Andrae, U., Balmaseda, M. A., Balsamo, G., Bauer, P., Bechtold, P., Beljaars, A. C. M., van de Berg, L., Bidlot, J., Bormann, N., Delsol, C., Dragani, R., Fuentes, M., Geer, A. J., Haimberger, L., Healy, S. B., Hersbach, H., Hólm, E. V., Isaksen, I., Kållberg, P., Köhler, M., Matricardi, M., McNally, A. P., Monge-Sanz, B. M., Morcrette, J.-J., Park, B.-K., Peubey, C., de Rosnay, P., Tavolato, C., Thépaut, J.-N., and Vitart, F.: The ERA-Interim reanalysis: configuration and performance of the data assimilation system, *Quarterly Journal of the Royal Meteorological Society*, 137, 553–597, <https://doi.org/10.1002/qj.828>, <http://dx.doi.org/10.1002/qj.828>, 2011.
- Doney, S. C. and Glover, D. M.: Modeling of Ocean Carbon System, pp. 291 – 302, <https://doi.org/https://doi.org/10.1016/B978-0-12-409548-9.11431-9>, <http://www.sciencedirect.com/science/article/pii/B9780124095489114319>, 2019.
- 590 d’Ovidio, F., Della Penna, A., Trull, T. W., Nencioli, F., Pujol, M.-I., Rio, M.-H., Park, Y.-H., Cotté, C., Zhou, M., and Blain, S.: The biogeochemical structuring role of horizontal stirring: Lagrangian perspectives on iron delivery downstream of the Kerguelen Plateau, *Biogeosciences*, 12, 5567–5581, <https://doi.org/10.5194/bg-12-5567-2015>, <https://www.biogeosciences.net/12/5567/2015/>, 2015.
- Dufour, C. O., Sommer, J. L., Gehlen, M., Orr, J. C., Molines, J.-M., Simeon, J., and Barnier, B.: Eddy compensation and controls of the enhanced sea-to-air CO<sub>2</sub> flux during positive phases of the Southern Annular Mode, *Global Biogeochemical Cycles*, 27, 950–961, <https://doi.org/10.1002/gbc.20090>, <https://agupubs.onlinelibrary.wiley.com/doi/abs/10.1002/gbc.20090>, 2013.
- 595 Fennel, K., Gehlen, M., Brasseur, P., Brown, C. W., Ciavatta, S., Cossarini, G., Crise, A., Edwards, C. A., Ford, D., Friedrichs, M. A. M., Gregoire, M., Jones, E., Kim, H., Lamouroux, J., Murtugudde, R., Perruche, C., the GODAE OceanView Marine Ecosystem Analysis, and Team, P. T.: Advancing Marine Biogeochemical and Ecosystem Reanalyses and Forecasts as Tools for Monitoring and Managing Ecosystem Health, *Frontiers in Marine Science*, 6, 89, <https://doi.org/https://doi.org/10.3389/fmars.2019.00089>, 2019.
- 600 Ford, D., Key, S., McEwan, R., Totterdell, I., and Gehlen, M.: Marine Biogeochemical Modelling and Data Assimilation for Operational Forecasting, Reanalysis, and Climate Research, *New Frontiers In Operational Oceanography*, [https://doi.org/http://purl.flvc.org/fsu/fd/FSU\\_libsubv1\\_scholarship\\_submission\\_1536246093\\_2a45182](https://doi.org/http://purl.flvc.org/fsu/fd/FSU_libsubv1_scholarship_submission_1536246093_2a45182), 2018.
- Gruber, N. and Doney, S.: Modeling of Ocean Biogeochemistry and Ecology, pp. 547 – 560, <https://doi.org/https://doi.org/10.1016/B978-0-12-409548-9.11409-5>, <http://www.sciencedirect.com/science/article/pii/B9780124095489114095>, 2019.
- 605 Hewitt, H. T., Bell, M. J., Chassignet, E. P., Czaja, A., Ferreira, D., Griffies, S. M., Hyder, P., McClean, J. L., New, A. L., and Roberts, M. J.: Will high-resolution global ocean models benefit coupled predictions on short-range to climate timescales?, *Ocean Modelling*, 120, 120 – 136, <https://doi.org/https://doi.org/10.1016/j.ocemod.2017.11.002>, <http://www.sciencedirect.com/science/article/pii/S1463500317301774>, 2017.
- Kvale, K. F., Khatiwala, S., Dietze, H., Kriest, I., and Oschlies, A.: Evaluation of the transport matrix method for simulation of ocean biogeochemical tracers, *Geoscientific Model Development*, 10, 2425–2445, <https://doi.org/10.5194/gmd-10-2425-2017>, <https://www.geosci-model-dev.net/10/2425/2017/>, 2017.
- Large, W. G. and Yeager, S.: Diurnal to decadal global forcing for ocean and sea-ice models: the data sets and flux climatologies, NCAR Technical Note, NCAR/TN-460+STR, CGD Division of the National Center for Atmospheric Research, 2004.
- Leclair, M. and Madec, G.: A conservative leapfrog time stepping method, *Ocean Modelling*, 30, 88 – 94, <https://doi.org/https://doi.org/10.1016/j.ocemod.2009.06.006>, <http://www.sciencedirect.com/science/article/pii/S1463500309001206>, 2009.
- 615 Levier, B., Tréguier, A.-M., Madec, G., and Garnier, V.: Free surface and variable volume in the NEMO code, Tech. rep., MERSEA MERSEA IP report WP09-CNRS-STR-03-1A, 47pp, available on the NEMO web site, 2007.
- Lévy, M., Estubier, A., and Madec, G.: Choice of an advection scheme for biogeochemical models, *Geophys. Res. Lett.*, 28, 2001.

- 620 Lévy, M., Resplandy, L., Klein, P., Capet, X., Iovino, D., and Ethé, C.: Grid degradation of submesoscale resolving ocean models: Benefits for offline passive tracer transport, *Ocean Modelling*, 48, 1–9, <https://doi.org/10.1016/j.ocemod.2012.02.004>, <http://www.sciencedirect.com/science/article/pii/S1463500312000340>, 2012.
- Lévy, M., Franks, P. J., and Smith, K. S.: The role of submesoscale currents in structuring marine ecosystems, *Nature Communications*, 9, 4758, <https://doi.org/10.1038/s41467-018-07059-3>, <https://hal.sorbonne-universite.fr/hal-01924116>, 2018.
- 625 Madec, G.: NEMO ocean engine, 2008.
- Madec, G. and Imbard, M.: A global ocean mesh to overcome the north pole singularity, 12, 381–388, 1996.
- Maraldi, C., Chanut, J., Levier, B., Ayoub, N., De Mey, P., Reffray, G., Lyard, F., Cailleau, S., Dréville, M., Fanjul, E. A., Sotillo, M. G., Marsaleix, P., the Mercator Research, and Team, D.: NEMO on the shelf: assessment of the Iberian-Biscay-Ireland configuration, *Ocean Science*, 9, 745–771, <https://doi.org/10.5194/os-9-745-2013>, <https://www.ocean-sci.net/9/745/2013/>, 2013.
- 630 Perruche, C., Hameau, A., Paul, J., Régnier, C., and Dréville, M.: QUALITY INFORMATION DOCUMENT For Global Biogeochemical Analysis and Forecast Product, <http://cmems-resources.cls.fr/documents/QUID/CMEMS-GLO-QUID-001-014.pdf>, 2016.
- Reffray, G., Bourdalle-Badie, R., and Calone, C.: Modelling turbulent vertical mixing sensitivity using a 1-D version of NEMO, *Geoscientific Model Development*, 8, 69–86, <https://doi.org/10.5194/gmd-8-69-2015>, <https://www.geosci-model-dev.net/8/69/2015/>, 2015.
- Resplandy, L., Lévy, M., and McGillicuddy Jr., D. J.: Effects of Eddy-Driven Subduction on Ocean Biological Carbon Pump, *Global Biogeochemical Cycles*, 33, 1071–1084, <https://doi.org/10.1029/2018GB006125>, <https://agupubs.onlinelibrary.wiley.com/doi/abs/10.1029/2018GB006125>, 2019.
- 635 Rickard, G. J., Behrens, E., and Chiswell, S. M.: CMIP5 earth system models with biogeochemistry: An assessment for the southwest Pacific Ocean, *Journal of Geophysical Research: Oceans*, 121, 7857–7879, <https://doi.org/10.1002/2016JC011736>, <https://agupubs.onlinelibrary.wiley.com/doi/abs/10.1002/2016JC011736>, 2016.
- 640 Rousset, C., Vancoppenolle, M., Madec, G., Fichefet, T., Flavoni, S., Barthélemy, A., Benschila, R., Chanut, J., Lévy, C., Masson, S., and Vivier, F.: The Louvain-La-Neuve sea-ice model LIM3.6: Global and regional capabilities, *Geoscientific Model Development*, 8, 2991–3005, <https://doi.org/10.5194/gmd-8-2991-2015>, <http://dx.doi.org/10.5194/gmd-8-2991-2015>, 2015.
- Séférian, R., Gehlen, M., Bopp, L., Resplandy, L., Orr, J. C., Marti, O., Dunne, J. P., Christian, J. R., Doney, S. C., Ilyina, T., Lindsay, K., Halloran, P. R., Heinze, C., Segschneider, J., Tjiputra, J., Aumont, O., and Romanou, A.: Inconsistent strategies to spin up models in CMIP5: implications for ocean biogeochemical model performance assessment, *Geoscientific Model Development*, 9, 1827–1851, <https://doi.org/10.5194/gmd-9-1827-2016>, <https://www.geosci-model-dev.net/9/1827/2016/>, 2016.
- 645 Skamarock, W. C.: Evaluating Mesoscale NWP Models Using Kinetic Energy Spectra, *Monthly Weather Review*, 132, 3019–3032, <https://doi.org/10.1175/MWR2830.1>, <https://doi.org/10.1175/MWR2830.1>, 2004.
- Soufflet, Y., Marchesiello, P., Lemarié, F., Jouanno, J., Capet, X., Debreu, L., and Benschila, R.: On effective resolution in ocean models, *Ocean Modelling*, 98, 36 – 50, <https://doi.org/https://doi.org/10.1016/j.ocemod.2015.12.004>, <http://www.sciencedirect.com/science/article/pii/S1463500315002401>, 2016.
- 650 Vancoppenolle, M., Fichefet, T., Goosse, H., Bouillon, S., Madec, G., and Maqueda, M. A. M.: Simulating the mass balance and salinity of Arctic and Antarctic sea ice. 1. Model description and validation, *Oceanogr. Meteorol.*, 27, 33–53, <https://doi.org/10.1016/j.ocemod.2008.10.005>, <http://dx.doi.org/10.1016/j.ocemod.2008.10.005>, 2009.
- 655 Voldoire, A., Sanchez-Gomez, E., Salas y Méliá, D., Decharme, B., Cassou, C., Sénési, S., Valcke, S., Beau, I., Alias, A., Chevallier, M., Déqué, M., Deshayes, J., Douville, H., Fernandez, E., Madec, G., Maisonnave, E., Moine, M.-P., Planton, S., Saint-Martin, D., Szopa, S., Tyteca, S., Alkama, R., Belamari, S., Braun, A., Coquart, L., and Chauvin, F.: The CNRM-CM5.1 global climate model:

- description and basic evaluation, *Climate Dynamics*, 40, 2091–2121, <https://doi.org/10.1007/s00382-011-1259-y>, <https://doi.org/10.1007/s00382-011-1259-y>, 2013.
- 660 Voldoire, A., Saint-Martin, D., Sénési, S., Decharme, B., Alias, A., Chevallier, M., Colin, J., Guérémy, J.-F., Michou, M., Moine, M.-P., Nabat, P., Roehrig, R., Salas y Méliá, D., Sférian, R., Valcke, S., Beau, I., Belamari, S., Berthet, S., Cassou, C., Cattiaux, J., Deshayes, J., Douville, H., Ethé, C., Franchistéguy, L., Geoffroy, O., Lévy, C., Madec, G., Meurdesoif, Y., Msadek, R., Ribes, A., Sanchez-Gomez, E., Terray, L., and Waldman, R.: Evaluation of CMIP6 DECK Experiments With CNRM-CM6-1, *Journal of Advances in Modeling Earth Systems*, 11, 2177–2213, <https://doi.org/10.1029/2019MS001683>, <https://agupubs.onlinelibrary.wiley.com/doi/abs/10.1029/2019MS001683>,  
665 2019.
- Ward, B. A., Dutkiewicz, S., Jahn, O., and Follows, M. J.: A size-structured food-web model for the global ocean, *Limnology and Oceanography*, 57, 1877–1891, <https://doi.org/10.4319/lo.2012.57.6.1877>, <https://aslopubs.onlinelibrary.wiley.com/doi/abs/10.4319/lo.2012.57.6.1877>, 2012.
